# Supplementary material for: Sleep health of Australian community tennis players during the COVID-19 lockdown
Source: PeerJ. 2022 Apr 12;10:e13045. doi: 10.7717/peerj.13045 (PMC9012171; doi:10.7717/peerj.13045)
Supplement: Supplemental Information 1 [file peerj-10-13045-s001.xlsx]

## Sheet: Raw data
Consent	My country of residence:	How do you describe yourself?	My age:	My relationship status:	What match format do you predominately play?	How long have you been playing tennis?	On average, since the COVID-19 situation how many hours a week are you training: - Tennis	On average, since the COVID-19 situation how many hours a week are you training: - Strength	On average, since the COVID-19 situation how many hours a week are you training: - Endurance	On average, since the COVID-19 situation how many hours a week are you training: - Speed & Agility	Where are you performing your physical training? - Selected Choice	Where are you performing your physical training? - Others (Please specify) - Text	Since the COVID-19 situation how often do you drink alcohol?	Have you contracted COVID-19?	In general, how would you rate your sleep quality?	Thinking about just the past 7 days, what time did you most often go to bed on work days? If you did not work last week, please answer about weekdays. [please report 24 hour time; e.g. 2200]	What about on non-work days or weekends â€“ what time did you most often go to bed on those days? [please report 24 hour time; e.g. 2200]	What time did you most often wake up for the day on work days or weekdays? [please report 24 hour time; e.g. 0600]	What about on non-work days or weekends â€“ what time did you most often wake up for the day on those days? [please report 24 hour time; e.g. 0600]	During the past 7 days, how many days did you wake up feeling well-rested, if any?	How many nights did you have trouble falling asleep?	And how many nights did you have trouble staying asleep?	Still thinking about the past 7 days, how many days did poor or insufficient sleep significantly impact your daily activities, like your work performance, socializing, exercising, or other typical activities?	How many days did you fall asleep without intending to, such as dozing off in front of the TV or in any other situation?	How many nights did you take over-the-counter or prescription medication to help you sleep?	Have you ever been told by a doctor that you have a sleep disorder, such as insomnia or sleep apnea, or not?	Have you ever discussed any sleep problems you were having with a doctor or medical professional?	How many hours of sleep do you need per day to be well-rested and feel your best?	How satisfied are you with your sleep overall?	Generally speaking, when you wake up in the morning, how refreshed do you feel?	Based on how well you sleep, how energized do you generally feel as you go about your day?	How much trouble do you generally have falling asleep, if any?	How often do you wake up during the night for any reason?	If you wake up after falling asleep, is it generally easy or difficult to fall back asleep?	In general, how satisfied are you with the amount of sleep you get on work-days or weekdays?	In general, how satisfied are you with the amount of sleep you get on weekends or non-work days?	How easy or difficult is it for you to achieve a relaxed mental state before going to bed â€” is thisâ€¦
Yes, I consent for my responses to be used for research purposes	Australia	Female	26-30 years	I am presently in a comitted relationship	Singles and doubles	3 to 5 years	1	0	1	0	Home		Once a week	No	Poor	2130	2200	630	730	1	2	3	0	0	0	No	No	7	Dissatisfied	Hardly refreshed	Energised	A little trouble	Often	A little difficult	Dissatisfied	Dissatisfied	A little difficult
Yes, I consent for my responses to be used for research purposes	Australia	Male	26-30 years	I am presently in a comitted relationship	Singles and doubles	More than 20 years	1	1	7	0	Home,Local park,Sporting club		Few times a week	No	Good	2230	2330	620	730	5	0	0	0	0	0	No	No	7	Satisfied	Refreshed	Energised	A little trouble	Sometimes	Not difficult	Satisfied	Very Satisfied	A little difficult
Yes, I consent for my responses to be used for research purposes	Australia	Female	22-25 years	I am presently in a comitted relationship	Singles	1 to 3 years	0	1	2	1	Home		less than once a month	No	Good	2130	2200	525	700	3	2	0	3	0	0	No	No	8	Satisfied	Refreshed	Hardly energised	No trouble at all	Rarely	Not difficult	Satisfied	Very Satisfied	A little difficult
Yes, I consent for my responses to be used for research purposes	Australia	Male	26-30 years	I am presently in a comitted relationship	Singles and doubles	More than 20 years	1	0	0	0	I'm not performing any physical training during the COVID-19 situation		Once a week	No	Good	2300	2300	930	930	3	5	0	1	0	0	No	No	8	Satisfied	Hardly refreshed	Energised	A little trouble	Never	Not difficult	Satisfied	Satisfied	A little difficult
Yes, I consent for my responses to be used for research purposes	Australia	Male	22-25 years	I am single	Singles and doubles	More than 20 years	10	3	2	2	Home		Once a week	No	Good	0	0	830	830		2	0	1	1	0	No	No	8	Dissatisfied	Refreshed	Energised	A fair amount of trouble	Sometimes	Not difficult	Dissatisfied	Dissatisfied	Difficult
Yes, I consent for my responses to be used for research purposes	Australia	Male	61-70 years	I am presently in a comitted relationship	Doubles	More than 20 years	1	0	0	0	I'm not performing any physical training during the COVID-19 situation		Few times a week	No	Good	2230	223006	600	630	7	1	1	Don't know	7	0	No	No	7	Satisfied	Refreshed	Hardly energised	No trouble at all	Often	Not difficult	Satisfied	Satisfied	Not difficult at all
Yes, I consent for my responses to be used for research purposes	Australia	Male	26-30 years	I am presently in a comitted relationship	Singles and doubles	More than 20 years	0	0	1	0	Local park		Few times a week	No	Good	2130	2200	630	800	6	1	1	1	0	0	No	No	8	Very Satisfied	Refreshed	Energised	No trouble at all	Sometimes	Not difficult	Very satisfied	Very Satisfied	Not difficult at all
Yes, I consent for my responses to be used for research purposes	Australia	Male	41-50 years	I am presently in a comitted relationship	Singles and doubles	More than 20 years	0	0	0	0	I'm not performing any physical training during the COVID-19 situation		Few times a week	No	Good	2245	2300	630	830	5	0	0	1	4	0	No	No	8	Satisfied	Refreshed	Energised	No trouble at all	Rarely	Not difficult	Dissatisfied	Satisfied	A little difficult
Yes, I consent for my responses to be used for research purposes	Australia	Female	51-60 years	I am presently in a comitted relationship	Doubles	10 to 15 years	0	0	4	0	I'm not performing any physical training during the COVID-19 situation		less than once a month	No	Good	2200	2200	05 30	05 30	5	0	2	0	0	0	No	No	7	Satisfied	Refreshed	Energised	No trouble at all	Sometimes	A little difficult	Satisfied	Satisfied	Not difficult at all
Yes, I consent for my responses to be used for research purposes	Australia	Do not identify as female, male or transgender	41-50 years	I am presently in a comitted relationship	Doubles	More than 20 years	0	0	4	0	Local park		Few times a week	Unsure	Good	2200	2200	500	600	Don't know	0	3	1	1	0	No	No	7	Very Satisfied	Refreshed	Energised	A little trouble	Almost always	Not difficult	Satisfied	Satisfied	Not difficult at all
Yes, I consent for my responses to be used for research purposes	Australia	Female	51-60 years	I am presently in a comitted relationship	Doubles	More than 20 years	0	0	0	0	I'm not performing any physical training during the COVID-19 situation		Once every two weeks	No	Fair	130	130	800	900	2	2	4	4		0	No	No	8	Dissatisfied	Refreshed	Not energised at all	A little trouble	Almost always	Very difficult	Satisfied	Satisfied	A little difficult
Yes, I consent for my responses to be used for research purposes	Australia	Female	61-70 years	I am single	Doubles	More than 20 years	0	0	8	0	Local park		less than once a month	No	Fair	2230	2300	800	700	5	1	1	0	5	0	No	No	8	Satisfied	Refreshed	Energised	A little trouble	Almost always	Not difficult	Satisfied	Satisfied	A little difficult
Yes, I consent for my responses to be used for research purposes	Australia	Male	51-60 years	I am presently in a comitted relationship	Doubles	More than 20 years	0	3	10	1	Home,Local park		Few times a week	No	Poor	1 day, 0:00:00	01:00:00	07:30:00	08:30:00	2	4	3	3	2	0	No	No	7	Dissatisfied	Hardly refreshed	Hardly energised	A little trouble	Sometimes	A little difficult	Dissatisfied	Satisfied	A little difficult
Yes, I consent for my responses to be used for research purposes	Australia	Male	22-25 years	I am presently in a comitted relationship	Singles	15 to 20 years	0	2	3	0	Home,Local park		less than once a month	Unsure	Fair	200	200	1130	1130	3	2	4	2	0	0	No	Yes	9	Dissatisfied	Hardly refreshed	Energised	A little trouble	Often	A little difficult	Satisfied	Satisfied	Difficult
Yes, I consent for my responses to be used for research purposes	Australia	Male	36-40 years	I am presently in a comitted relationship	Singles and doubles	More than 20 years	0	1	0	0	Home		Few times a week	No	Fair	2230	2230	7	730	3	1	2	1	0	0	No	No	8	Satisfied	Refreshed	Energised	No trouble at all	Often	Not difficult	Satisfied	Satisfied	A little difficult
Yes, I consent for my responses to be used for research purposes	Australia	Male	31-35 years	I am single	Singles and doubles	3 to 5 years	0	0	2	0	I'm not performing any physical training during the COVID-19 situation		Few times a week	No	Poor	2330	100	730	1100	3	6	0	3	0	0	No	No	8	Dissatisfied	Hardly refreshed	Hardly energised	A fair amount of trouble	Never	Not difficult	Dissatisfied	Satisfied	Difficult
Yes, I consent for my responses to be used for research purposes	Australia	Female	36-40 years	I am presently in a comitted relationship	Singles and doubles	15 to 20 years	0	0	0	0	Home,Local park		Few times a week	No	Good	2300	2400	700	900	3	2	0	1	1	0	No	No	8	Dissatisfied	Hardly refreshed	Energised	No trouble at all	Sometimes	A little difficult	Dissatisfied	Dissatisfied	A little difficult
Yes, I consent for my responses to be used for research purposes	Australia	Male	22-25 years	I am presently in a comitted relationship	Singles	10 to 15 years	0	7	4	1	Home,Local park		Once every two weeks	No	Fair	100	100	730	900	0	5	3	2	0	0	No	No	7	Dissatisfied	Hardly refreshed	Energised	A fair amount of trouble	Sometimes	A little difficult	Dissatisfied	Satisfied	A little difficult
Yes, I consent for my responses to be used for research purposes	Australia	Male	61-70 years	I am presently in a comitted relationship	Doubles	10 to 15 years	0	0	0	0	I'm not performing any physical training during the COVID-19 situation		Few times a week	No	Fair	2230	2300	700	800	3	1	4	1	0	0	No	No	7	Dissatisfied	Refreshed	Hardly energised	No trouble at all	Often	A little difficult	Satisfied	Satisfied	Not difficult at all
Yes, I consent for my responses to be used for research purposes	Australia	Male	51-60 years	I am presently in a comitted relationship	Singles and doubles	More than 20 years	0	0	0	1	Home,Local park,Others (Please specify)	bike riding	Once a month	No	Good	midnight	midnight	8.3	9	6	3	1	0	2	0	No	No	7	Satisfied	Refreshed	Energised	A little trouble	Sometimes	Not difficult	Satisfied	Satisfied	A little difficult
Yes, I consent for my responses to be used for research purposes	Australia	Male	61-70 years	I am presently in a comitted relationship	Singles	15 to 20 years	0	1	0	0	Home		Few times a week	No	Good	1:00am	1:00am	8:00am	9:00am	5	2	0	3	Don't know	0	No	No	7	Satisfied	Refreshed	Energised	No trouble at all	Often	Not difficult	Satisfied	Satisfied	Not difficult at all
Yes, I consent for my responses to be used for research purposes	Australia	Female	41-50 years	I am presently in a comitted relationship	Singles and doubles	More than 20 years	1	1	1	0	Home,Local park		Few times a week	Unsure	Good	2200	2200	600	600	5	0	2	1	1	0	No	No	8	Satisfied	Refreshed	Very energised	No trouble at all	Rarely	Not difficult	Satisfied	Satisfied	Not difficult at all
Yes, I consent for my responses to be used for research purposes	Australia	Female	61-70 years	I am presently in a comitted relationship	Doubles	15 to 20 years	0	2	1	1	Home,Local park		Few times a week	No	Fair	22:30:00	22:30:00	08:00:00	08:00:00	3	0	2	0	0	0	No	No	8	Satisfied	Refreshed	Energised	A little trouble	Almost always	A little difficult	Satisfied	Satisfied	Not difficult at all
Yes, I consent for my responses to be used for research purposes	Australia	Female	61-70 years	I am presently in a comitted relationship	Singles and doubles	More than 20 years	0	1	0	0	Home,Others (Please specify)	walking, bike riding	Few times a week	No	Poor	23	23	5-6.00	5-600	0	7	7	Don't know	Don't know	7	No	Yes	7	Very Dissatisfied	Not refreshed at all	Very energised	A lot of trouble	Almost always	Very difficult	Very Dissatisfied	Satisfied	A little difficult
Yes, I consent for my responses to be used for research purposes	Australia	Male	61-70 years	I am presently in a comitted relationship	Doubles	More than 20 years	0	0	4	0	Home,Others (Please specify)	road cycling	Few times a week	No	Good	2400	2400	730	730	2	1	2	1	3	0	Yes	Yes	7	Satisfied	Refreshed	Energised	A little trouble	Sometimes	A little difficult	Dissatisfied	Dissatisfied	A little difficult
Yes, I consent for my responses to be used for research purposes	Australia	Male	22-25 years	I am single	Singles and doubles	15 to 20 years	0	1	3	0	Home,Others (Please specify)	Roads up hills near my home	less than once a month	No	Fair	2300	100	800	830	5	0	0	0	0	0	No	No	8	Satisfied	Refreshed	Very energised	No trouble at all	Never	Not difficult	Satisfied	Very Satisfied	Not difficult at all
Yes, I consent for my responses to be used for research purposes	Australia	Male	61-70 years	I am single	Doubles	More than 20 years	0	0	2	0	Home		Few times a week	Unsure	Fair	30	307	730	730	2	2	2	2	3	0	No	No	6	Dissatisfied	Hardly refreshed	Hardly energised	A little trouble	Often	Difficult	Dissatisfied	Dissatisfied	A little difficult
Yes, I consent for my responses to be used for research purposes	Australia	Male	41-50 years	I am presently in a comitted relationship	Doubles	More than 20 years	0	0	0	0	Home,Local park		Few times a week	No	Fair	2200	2200	600	700	3	2	5	1	0	0	No	No	8	Dissatisfied	Hardly refreshed	Energised	A little trouble	Often	A little difficult	Dissatisfied	Dissatisfied	A little difficult
Yes, I consent for my responses to be used for research purposes	Australia	Female	51-60 years	I am presently in a comitted relationship	Doubles	15 to 20 years	0	0	2	0	Local park		Few times a week	Unsure	Very good	2300	2300	800	900	4	1	4	1	1	0	No	No	9	Satisfied	Hardly refreshed	Hardly energised	No trouble at all	Sometimes	Difficult	Satisfied	Satisfied	Not difficult at all
Yes, I consent for my responses to be used for research purposes	Australia	Female	26-30 years	I am single	Singles and doubles	More than 20 years	0	0	2	1	Home,Local park		Once a week	No	Good	30	130	800	1030	1	7	7	2	1	0	No	No	9	Dissatisfied	Hardly refreshed	Hardly energised	A fair amount of trouble	Often	A little difficult	Satisfied	Very Satisfied	Very Difficult
Yes, I consent for my responses to be used for research purposes	Australia	Male	41-50 years	I am presently in a comitted relationship	Singles	More than 20 years	0	0	3	0	Home		Few times a week	Unsure	Very good	2230	2300	630	730	6	0	0	0	7		No	No	7	Satisfied	Refreshed	Energised	No trouble at all	Sometimes	Difficult	Satisfied	Satisfied	Not difficult at all
Yes, I consent for my responses to be used for research purposes	Australia	Female	26-30 years	I am presently in a comitted relationship	Singles and doubles	More than 20 years	2	0	5	2	Home,Others (Please specify)	Running outdoors	Few times a week	No	Good	0	100	745	900	1	0	1	6	0	1	No	No	6	Satisfied	Hardly refreshed	Energised	No trouble at all	Almost always	Not difficult	Very Dissatisfied	Dissatisfied	A little difficult
Yes, I consent for my responses to be used for research purposes	Australia	Male	41-50 years	I am single	Doubles	More than 20 years	0	1	0	0	Home		Once a week	No	Poor	1am	2am	7am	7am	3	0	6	3	2	0	No	Yes	7	Dissatisfied	Hardly refreshed	Energised	No trouble at all	Often	Very difficult	Dissatisfied	Dissatisfied	Not difficult at all
Yes, I consent for my responses to be used for research purposes	Australia	Female	61-70 years	I am presently in a comitted relationship	Doubles	More than 20 years	0	0	1	0	Home,Local park		Few times a week	No	Good	2200	2200	800	800	4	0	5	1	0	0	No	No	8	Dissatisfied	Refreshed	Energised	No trouble at all	Almost always	Difficult	Satisfied	Satisfied	A little difficult
Yes, I consent for my responses to be used for research purposes	Australia	Male	36-40 years	I am presently in a comitted relationship	Singles and doubles	More than 20 years	0	1	0	0	Home		Few times a week	No	Good	2200	2200	700	700	2	0	2	0	0	0		No	10	Satisfied	Hardly refreshed	Energised	A little trouble	Often	Very difficult	Satisfied	Satisfied	A little difficult
Yes, I consent for my responses to be used for research purposes	Australia	Male	41-50 years	I am presently in a comitted relationship	Singles and doubles	More than 20 years	0	1	1	0	Home		Few times a week	No	Fair	2130	2330	400	730	2	0	0	2	2	0	No	No		Satisfied	Hardly refreshed	Hardly energised	No trouble at all	Rarely	Not difficult	Dissatisfied	Satisfied	Not difficult at all
Yes, I consent for my responses to be used for research purposes	Australia	Male	31-35 years	I am presently in a comitted relationship	Singles and doubles	More than 20 years	0	1	3	1	Home		Few times a week	No	Good	2200	2200	600	700	4	1	2	1	0	0	No	No	7	Satisfied	Refreshed	Energised	A little trouble	Sometimes	A little difficult	Satisfied	Very Satisfied	Difficult
Yes, I consent for my responses to be used for research purposes	Australia	Female	41-50 years	I am presently in a comitted relationship	Doubles	10 to 15 years	0	1	0	1	Home,Local park		Once a week	No	Very good	2130	2230	700	700	6	0	1	0	0	0	No	No	8	Very Satisfied	Very refreshed	Energised	No trouble at all	Sometimes	A little difficult	Very satisfied	Very Satisfied	Not difficult at all
Yes, I consent for my responses to be used for research purposes	Australia	Female	51-60 years	I am presently in a comitted relationship	Doubles	More than 20 years	0	0	3	0	Local park		Few times a week	No	Fair	22:00:00	22:00:00	06:00:00	09:00:00	5	0	7	0	1	0	No	No	8	Satisfied	Refreshed	Energised	No trouble at all	Almost always	A little difficult	Satisfied	Satisfied	Not difficult at all
Yes, I consent for my responses to be used for research purposes	Australia	Male	26-30 years	I am presently in a comitted relationship	Singles and doubles	15 to 20 years	0	1	2	0	Home		Once every two weeks	No	Good	2200	2200	800	800	5	3	0	0	1	0	No	No	8	Satisfied	Refreshed	Energised	A fair amount of trouble	Often	A little difficult	Satisfied	Satisfied	Difficult
Yes, I consent for my responses to be used for research purposes	Australia	Female	51-60 years	I am presently in a comitted relationship	Doubles	More than 20 years	0	0	1	0	Home,Local park		Few times a week	Unsure	Fair	2100	2200	630	730	5	0	3	2	3	0	No	Yes	8	Satisfied	Refreshed	Energised	A little trouble	Almost always	A little difficult	Satisfied	Very Satisfied	Not difficult at all
Yes, I consent for my responses to be used for research purposes	Australia	Female	41-50 years	I am presently in a comitted relationship	Singles and doubles	More than 20 years	0	0	1	0	I'm not performing any physical training during the COVID-19 situation		Few times a week	No	Good	2200	2300	800	900	4	1	2	1	0	0	No	No	9	Satisfied	Hardly refreshed	Energised	A fair amount of trouble	Often	A little difficult	Satisfied	Satisfied	A little difficult
Yes, I consent for my responses to be used for research purposes	Australia	Male	41-50 years	I am presently in a comitted relationship	Singles and doubles	5 to 10 years	0	0	7	0	Local park		I don't drink alcohol at all	No	Poor	2300	2300	630	630	2	2	5	4	1	0	Yes	Yes	7	Very Dissatisfied	Hardly refreshed	Hardly energised	No trouble at all	Often	Very difficult	Dissatisfied	Dissatisfied	Very Difficult
Yes, I consent for my responses to be used for research purposes	Australia	Male	51-60 years	I am presently in a comitted relationship	Singles and doubles	5 to 10 years	0	0	3	0	Local park		Few times a week	No	Good	22:30:00	22:30:00	07:00:00	08:15:00	5	1	1	0	1	0	No	No	8	Satisfied	Refreshed	Energised	No trouble at all	Often	Not difficult	Satisfied	Satisfied	Not difficult at all
Yes, I consent for my responses to be used for research purposes	Australia	Female	51-60 years	I am single	Doubles	More than 20 years	0	1	1	0	Home,Local park		Few times a week	No	Very good	23:00:00	1 day, 0:00:00	06:30:00	09:30:00	3	0	0	2	0	0	No	No	8	Satisfied	Refreshed	Hardly energised	No trouble at all	Sometimes	Not difficult	Dissatisfied	Very Satisfied	Not difficult at all
Yes, I consent for my responses to be used for research purposes	Australia	Male	41-50 years	I am presently in a comitted relationship	Singles and doubles	More than 20 years	1	3	1	0	Home,Local park		Once a week	No	Very good	9pm	9pm	630	530	7	0	0	0	0	0	No	No	8	Very Satisfied	Refreshed	Energised	No trouble at all	Sometimes	Not difficult	Very satisfied	Very Satisfied	Not difficult at all
Yes, I consent for my responses to be used for research purposes	Australia	Male	71 years or older	I am presently in a comitted relationship	Doubles	More than 20 years	3	10	10	15	I'm not performing any physical training during the COVID-19 situation		Few times a week	No	Very good	11pm	11pm	7am	10am	7	0	0	0	6	0	No	No	8	Satisfied	Refreshed	Energised	No trouble at all	Often	A little difficult	Satisfied	Very Satisfied	Not difficult at all
Yes, I consent for my responses to be used for research purposes	Australia	Male	51-60 years	I am presently in a comitted relationship	Doubles	More than 20 years	1	0	0	0	Home		Few times a week	No	Good	23	2400	615	830	4	0	0	0	1	1	No	Yes	7	Satisfied	Hardly refreshed	Hardly energised	A little trouble	Sometimes	Not difficult	Satisfied	Satisfied	Not difficult at all
Yes, I consent for my responses to be used for research purposes	Australia	Male	61-70 years	I am presently in a comitted relationship	Doubles	More than 20 years	0	0	0	0	I'm not performing any physical training during the COVID-19 situation		I don't drink alcohol at all	No	Very good	2100	2100	630	630	7	0	0	0	0	0	No	Yes	10	Satisfied	Hardly refreshed	Energised	No trouble at all	Never	Not difficult	Satisfied	Satisfied	Not difficult at all
Yes, I consent for my responses to be used for research purposes	Australia	Female	71 years or older	I am single	Doubles	More than 20 years	3	2	2	2	Home,Others (Please specify)	Gym	Few times a week	No	Good	2100	2100	700	800	6	3	0	0	0	0	No	No	9	Satisfied	Refreshed	Energised	A little trouble	Sometimes	Not difficult	Satisfied	Satisfied	A little difficult
Yes, I consent for my responses to be used for research purposes	Australia	Male	31-35 years	I am presently in a comitted relationship	Singles	5 to 10 years	5	0	0	0	Sporting club		Once a week	No	Good	2200	2300	630	700	Don't know	0	0	0	0	0	No	No	8	Satisfied	Refreshed	Energised	A little trouble	Rarely	Not difficult	Satisfied	Satisfied	Not difficult at all
Yes, I consent for my responses to be used for research purposes	Australia	Female	51-60 years	I am presently in a comitted relationship	Doubles	More than 20 years	0	0	0	0	I'm not performing any physical training during the COVID-19 situation		Few times a week	No	Poor	23:30:00	23:30:00	07:30:00	07:30:00	1	1	7	4	1	0	No	No	9	Dissatisfied	Hardly refreshed	Energised	A little trouble	Almost always	A little difficult	Dissatisfied	Dissatisfied	Not difficult at all
Yes, I consent for my responses to be used for research purposes	Australia	Male	22-25 years	I am single	Doubles	15 to 20 years	0	0	0	0	Local park		I don't drink alcohol at all	No	Very good	2200	2200	900	930	5	0	2	1	0	0	No	No	8	Very Satisfied	Very refreshed	Very energised	No trouble at all	Rarely	Not difficult	Satisfied	Satisfied	Not difficult at all
Yes, I consent for my responses to be used for research purposes	Australia	Male	41-50 years	I am presently in a comitted relationship	Doubles	15 to 20 years	0	0	0	0	Home		Once a week	No	Good	22:00:00	22:00:00	7:00am	07:00:00	1	0	4	1	0	0	No	No	7	Satisfied	Hardly refreshed	Hardly energised	No trouble at all	Often	A little difficult	Dissatisfied	Dissatisfied	Not difficult at all
Yes, I consent for my responses to be used for research purposes	Australia	Female	41-50 years	I am presently in a comitted relationship	Doubles	5 to 10 years	0	2	2	2	Home,Local park		Few times a week	No	Good	2300	2400	800	900	5	0	1	1	1	0	No	No	8	Satisfied	Refreshed	Energised	No trouble at all	Sometimes	A little difficult	Satisfied	Satisfied	Not difficult at all
Yes, I consent for my responses to be used for research purposes	Australia	Male	51-60 years	I am presently in a comitted relationship	Singles	More than 20 years	2	1	1	0	Home		Few times a week	No	Very good	2200	2200	600	600	5	0	0	2	1	0	No	No	7	Satisfied	Refreshed	Energised	No trouble at all	Almost always	A little difficult	Satisfied	Satisfied	Not difficult at all
Yes, I consent for my responses to be used for research purposes	Australia	Male	41-50 years	I am presently in a comitted relationship	Singles and doubles	More than 20 years	4	1	0	0	Home		Few times a week	No	Very good	2200	2230	700	700	7	0	0	0	0	0	No	No	8	Satisfied	Refreshed	Energised	A little trouble	Never	A little difficult	Satisfied	Satisfied	Not difficult at all
Yes, I consent for my responses to be used for research purposes	Australia	Female	51-60 years	I am presently in a comitted relationship	Doubles	More than 20 years	0	0	0	0	I'm not performing any physical training during the COVID-19 situation		Few times a week	No	Good	23.3	1	7.3	9.3	5	4	3	3	0	0	No	No	8	Satisfied	Refreshed	Energised	A little trouble	Sometimes	A little difficult	Satisfied	Very Satisfied	A little difficult
Yes, I consent for my responses to be used for research purposes	Australia	Female	51-60 years	I am presently in a comitted relationship	Doubles	More than 20 years	0	0	0	0	Home,Local park		Few times a week	No	Good	22:30:00	22:30:00	06:00:00	O:700	5	0	1	0	0	0	No	Yes	7	Satisfied	Very refreshed	Energised	No trouble at all	Almost always	Not difficult	Satisfied	Satisfied	Not difficult at all
Yes, I consent for my responses to be used for research purposes	Australia	Male	51-60 years	I am presently in a comitted relationship	Singles and doubles	More than 20 years	3	2	6	2	Home		Few times a week	No	Good	2300	2300	7.3	8	7	0	1	0	0	0	No	No	8	Satisfied	Refreshed	Energised	No trouble at all	Sometimes	Not difficult	Satisfied	Satisfied	Not difficult at all
Yes, I consent for my responses to be used for research purposes	Australia	Female	26-30 years	I am presently in a comitted relationship	Singles and doubles	More than 20 years	3	3	0	0	Home		Few times a week	No	Very good	2300	2300	800	900	7	0	0	0	0	0	No	No	8	Very Satisfied	Very refreshed	Very energised	No trouble at all	Rarely	Not difficult	Very satisfied	Very Satisfied	Not difficult at all
Yes, I consent for my responses to be used for research purposes	Australia	Female	61-70 years	I am presently in a comitted relationship	Doubles	More than 20 years	0	1	1	0	Home,Local park		Few times a week	No	Good	2100	2130	730	800	6	1	2	0	0	0	No	No	7	Satisfied	Refreshed	Energised	No trouble at all	Often	A little difficult	Satisfied	Satisfied	Not difficult at all
Yes, I consent for my responses to be used for research purposes	Australia	Female	51-60 years	I am presently in a comitted relationship	Doubles	More than 20 years	1	0	0	0	I'm not performing any physical training during the COVID-19 situation		Few times a week	No	Good	2230	2300	800	900	3	3	5	3	0	0	No	No	8	Satisfied	Hardly refreshed	Energised	A little trouble	Almost always	A little difficult	Satisfied	Satisfied	A little difficult
Yes, I consent for my responses to be used for research purposes	Australia	Male	51-60 years	I am presently in a comitted relationship	Doubles	More than 20 years	2	3	2	2	Home		Few times a week	No	Fair	2300	2300	730	830	4	2	2	1	1	0	No	No	7	Satisfied	Refreshed	Energised	A little trouble	Often	Difficult	Satisfied	Satisfied	A little difficult
Yes, I consent for my responses to be used for research purposes	Australia	Male	36-40 years	I am presently in a comitted relationship	Singles and doubles	3 to 5 years	0	0	0	0	Others (Please specify)	Walking	Once a week	No	Good	22.3	23	7	8	6	0	2	2	0	0	No	No	8	Satisfied	Refreshed	Energised	A little trouble	Sometimes	A little difficult	Satisfied	Satisfied	A little difficult
Yes, I consent for my responses to be used for research purposes	Australia	Male	41-50 years	I am presently in a comitted relationship	Singles	3 to 5 years	0	1	1	1	Home,Local park		Few times a week	No	Good	2300	0	800	900	4	2	2	2	1	0	No	No	9	Satisfied	Not refreshed at all	Hardly energised	A little trouble	Sometimes	Not difficult	Satisfied	Very Satisfied	A little difficult
Yes, I consent for my responses to be used for research purposes	Australia	Female	51-60 years	Other	Doubles	15 to 20 years	10	6	3	6	Local park		Few times a week	No	Fair	2200	1200	530	800	Don't know	3	4	4	6	0	Yes	Yes	8	Dissatisfied	Hardly refreshed	Hardly energised	No trouble at all	Sometimes	A little difficult	Satisfied	Satisfied	A little difficult
Yes, I consent for my responses to be used for research purposes	Australia	Male	41-50 years	I am presently in a comitted relationship	Singles and doubles	15 to 20 years	0	0	0	0	I'm not performing any physical training during the COVID-19 situation		Once every two weeks	No	Good	2300	30	700	900	4	1	0	4	1	3	No	No	9	Satisfied	Refreshed	Energised	No trouble at all	Sometimes	A little difficult	Satisfied	Satisfied	A little difficult
Yes, I consent for my responses to be used for research purposes	Australia	Male	61-70 years	I am presently in a comitted relationship	Doubles	More than 20 years	0	1	1	1	Home		Few times a week	No	Very good	200	0	900	900	3	1	1	0	5	0	No	No	7	Very Satisfied	Not refreshed at all	Energised	A little trouble	Rarely	Not difficult	Satisfied	Satisfied	Not difficult at all
Yes, I consent for my responses to be used for research purposes	Australia	Male	71 years or older	I am presently in a comitted relationship	Doubles	More than 20 years	0	0	0	0	I'm not performing any physical training during the COVID-19 situation		Few times a week	No	Good	2300	2300	700	700	5	2	1	0	2	0	No	No	7	Satisfied	Refreshed	Energised	No trouble at all	Often	A little difficult	Very satisfied	Very Satisfied	Not difficult at all
Yes, I consent for my responses to be used for research purposes	Australia	Male	51-60 years	I am presently in a comitted relationship	Singles and doubles	More than 20 years	0	0	0	0	I'm not performing any physical training during the COVID-19 situation		Few times a week	No	Good	2200	2330	630	730	5	0	3	3	4	0	No	No	7	Satisfied	Refreshed	Energised	No trouble at all	Almost always	A little difficult	Satisfied	Satisfied	Not difficult at all
Yes, I consent for my responses to be used for research purposes	Australia	Male	51-60 years	I am presently in a comitted relationship	Singles and doubles	More than 20 years	5	5	5	1	Local park		I don't drink alcohol at all	No	Fair	2300	2300	600	900	2	2	2	2	0	0	No	No	9	Satisfied	Refreshed	Energised	A little trouble	Sometimes	A little difficult	Satisfied	Satisfied	Difficult
Yes, I consent for my responses to be used for research purposes	Australia	Female	51-60 years	I am presently in a comitted relationship	Doubles	10 to 15 years	0	1	1	0	Home		Once a week	Unsure	Fair	2300	2400	900	1100	3	2	3	3	0	7	No	Yes	8	Dissatisfied	Hardly refreshed	Hardly energised	A little trouble	Often	A little difficult	Dissatisfied	Satisfied	A little difficult
Yes, I consent for my responses to be used for research purposes	Australia	Female	61-70 years	I am presently in a comitted relationship	Doubles	More than 20 years	0	0	0	0	I'm not performing any physical training during the COVID-19 situation		Once a month	No	Fair	2230	2230	700	700	3	4	6	2	0	0	No	Yes	9	Dissatisfied	Hardly refreshed	Energised	A little trouble	Almost always	A little difficult	Satisfied	Satisfied	A little difficult
Yes, I consent for my responses to be used for research purposes	Australia	Female	61-70 years	I am presently in a comitted relationship	Doubles	More than 20 years	0	0	0	0	I'm not performing any physical training during the COVID-19 situation		Once a week	No	Good	2130	2220	800	830	7	1	1	0	0	0	No	No	8	Very Satisfied	Refreshed	Energised	No trouble at all	Sometimes	Not difficult	Satisfied	Very Satisfied	Not difficult at all
Yes, I consent for my responses to be used for research purposes	Australia	Male	26-30 years	I am single	Singles and doubles	5 to 10 years	0	0	0	0	Local park		Once a month	No	Good	100	200	800	930	4	1	1	1	1	0	No	No	7	Satisfied	Refreshed	Energised	A little trouble	Often	A little difficult	Satisfied	Satisfied	A little difficult
Yes, I consent for my responses to be used for research purposes	Australia	Male	26-30 years	I am single	Singles and doubles	10 to 15 years	0	0	0	0	Home		Once a month	No	Fair	2200	2200	430	600	2	7	3	0	0	0	No	No	5	Satisfied	Refreshed	Very energised	A little trouble	Rarely	Very difficult	Satisfied	Satisfied	Not difficult at all
Yes, I consent for my responses to be used for research purposes	Australia	Female	51-60 years	I am single	Doubles	More than 20 years	0	0	0	0	I'm not performing any physical training during the COVID-19 situation		Once every two weeks	No	Fair	11.00 p.m.	11.00 p.m.	6.00 a.m.	7.30 p.m.	1		7	3	2	0	No	No	7	Dissatisfied	Hardly refreshed	Hardly energised	A little trouble	Almost always	A little difficult	Dissatisfied	Satisfied	Difficult
Yes, I consent for my responses to be used for research purposes	Australia	Female	41-50 years	I am presently in a comitted relationship	Singles and doubles	More than 20 years	0	0	0	0	I'm not performing any physical training during the COVID-19 situation		Once a week	No	Good	2330	2330	800	930	2	0	0	3	4	0	No	No	8	Satisfied	Refreshed	Hardly energised	No trouble at all	Sometimes	Not difficult	Satisfied	Satisfied	Not difficult at all
Yes, I consent for my responses to be used for research purposes	Australia	Male	51-60 years	I am presently in a comitted relationship	Singles	More than 20 years	0	0	0	0	Home		Once every two weeks	No	Fair	11.30pm	12.30am	8am	8.30am	4	1	3	0	2	0	No	No	7	Satisfied	Refreshed	Energised	A little trouble	Sometimes	Not difficult	Satisfied	Very Satisfied	Not difficult at all
Yes, I consent for my responses to be used for research purposes	Australia	Male	51-60 years	I am presently in a comitted relationship	Doubles	More than 20 years	0	0	0	0	Home		Few times a week	No	Good	2130	2200	600	600	4	3	3	2	7	0	No	No	9	Satisfied	Refreshed	Hardly energised	A little trouble	Sometimes	A little difficult	Satisfied	Satisfied	Not difficult at all
Yes, I consent for my responses to be used for research purposes	Australia	Female	71 years or older	I am presently in a comitted relationship	Doubles	More than 20 years	0	2	2	2	Home,Local park		I don't drink alcohol at all	No	Very good	23:00:00	23:00:00	7 30 am	7 30 am	7	2	1	0	1	0	No	No	8	Very Satisfied	Refreshed	Very energised	No trouble at all	Sometimes	Not difficult	Very satisfied	Very Satisfied	Not difficult at all
Yes, I consent for my responses to be used for research purposes	Australia	Male	41-50 years	I am presently in a comitted relationship	Doubles	More than 20 years	0	2	4	1	Home		Few times a week	No	Good	2300	2400	730	900	5	3	3	0	0	0	No	No	8	Satisfied	Refreshed	Hardly energised	A little trouble	Often	A little difficult	Satisfied	Very Satisfied	Difficult
Yes, I consent for my responses to be used for research purposes	Australia	Female	51-60 years	I am presently in a comitted relationship	Doubles	More than 20 years	0	0	0	0	Local park		Few times a week	No	Good	30	30	700	700	3	0	0	0	4	0	No	No	6	Satisfied	Refreshed	Energised	No trouble at all	Never	Not difficult	Satisfied	Satisfied	Not difficult at all
Yes, I consent for my responses to be used for research purposes	Australia	Male	36-40 years	I am presently in a comitted relationship	Singles and doubles	5 to 10 years	0	0	0	0	Home,Local park		less than once a month	No	Fair	2300	2400	800	900	5	1	0	Don't know	Don't know	Don't know	No	No	8	Satisfied	Refreshed	Energised	A little trouble	Sometimes	A little difficult	Satisfied	Satisfied	A little difficult
Yes, I consent for my responses to be used for research purposes	Australia	Male	41-50 years	I am presently in a comitted relationship	Singles	More than 20 years	0	0	1	1	Home		Once every two weeks	No	Very good	10:30pm	10:30pm	6:30am	8am	6	0	0	0	0	0	No	No	8	Very Satisfied	Refreshed	Energised	No trouble at all	Often	Not difficult	Satisfied	Satisfied	Not difficult at all
Yes, I consent for my responses to be used for research purposes	Australia	Male	51-60 years	I am presently in a comitted relationship	Singles and doubles	More than 20 years	1	1	1	1	Home,Sporting club		Once a week	No	Poor	21.15	12	5.3	9	2	1	7	5	1	2	Don't know	Yes	7	Very Dissatisfied	Hardly refreshed	Hardly energised	A little trouble	Almost always	Very difficult	Dissatisfied	Dissatisfied	A little difficult
Yes, I consent for my responses to be used for research purposes	Australia	Male	51-60 years	I am single	Doubles	More than 20 years	0	2	2	2	Home		Few times a week	No	Fair	8.30pm	9.30pm	5.00am	5.30am	4	3	2	2	4	0	No	No	7	Dissatisfied	Hardly refreshed	Hardly energised	A little trouble	Often	Not difficult	Satisfied	Satisfied	A little difficult
Yes, I consent for my responses to be used for research purposes	Australia	Female	51-60 years	I am presently in a comitted relationship	Doubles	More than 20 years	0	2	0	0	Home		Few times a week	No	Very good	2200	2200	630	630	6	0	0	0	0	0	Yes	Yes	7	Very Satisfied	Refreshed	Energised	A lot of trouble	Almost always	A little difficult	Satisfied	Satisfied	A little difficult
Yes, I consent for my responses to be used for research purposes	Australia	Male	41-50 years	I am presently in a comitted relationship	Doubles	More than 20 years	0	0	0	0	Home		Few times a week	Unsure	Fair	2230	2230	730	730	3	5	3	4	0	0	No	Yes	7	Dissatisfied	Hardly refreshed	Hardly energised	A little trouble	Sometimes	A little difficult	Dissatisfied	Dissatisfied	Difficult
Yes, I consent for my responses to be used for research purposes	Australia	Female	51-60 years	I am single	Doubles	More than 20 years	0	0	0	0	Home		I don't drink alcohol at all	No	Good	2200	2300	600	630	7	0	3	2	7	0	No	No	8	Satisfied	Refreshed	Energised	A little trouble	Often	A little difficult	Satisfied	Satisfied	A little difficult
Yes, I consent for my responses to be used for research purposes	Australia	Male	61-70 years	I am presently in a comitted relationship	Doubles	More than 20 years	0	0	0	0	I'm not performing any physical training during the COVID-19 situation		Few times a week	No	Fair	2200	2230	900	100	7	0	6	0	0	0	No	Yes	8	Dissatisfied	Refreshed	Energised	A little trouble	Almost always	Difficult	Satisfied	Satisfied	Not difficult at all
Yes, I consent for my responses to be used for research purposes	Australia	Female	61-70 years	I am presently in a comitted relationship	Doubles	More than 20 years	0	1	0	0	Home		Once a week	No	Fair	2230	2300	800	800	6	2	3	0	1	2	No	Yes	7	Dissatisfied	Refreshed	Energised	A little trouble	Often	Difficult	Very satisfied	Very Satisfied	Not difficult at all
Yes, I consent for my responses to be used for research purposes	Australia	Female	61-70 years	I am presently in a comitted relationship	Doubles	More than 20 years	0	0	0	0	Home		Few times a week	No	Very good	22	22	8	8	7	0	0	0	0	0	No	No	8	Very Satisfied	Very refreshed	Very energised	No trouble at all	Rarely	Not difficult	Very satisfied	Very Satisfied	Not difficult at all
Yes, I consent for my responses to be used for research purposes	Australia	Female	51-60 years	I am presently in a comitted relationship	Doubles	More than 20 years	0	0	2	0	Local park		Few times a week	No	Fair	2230	2330	700	830	2	2	3	2	1	0	No	No	8	Satisfied	Refreshed	Energised	A little trouble	Sometimes	Difficult	Dissatisfied	Satisfied	Not difficult at all
Yes, I consent for my responses to be used for research purposes	Australia	Female	41-50 years	I am presently in a comitted relationship	Doubles	More than 20 years	3	0	0	0	Others (Please specify)	bike rides	Few times a week	No	Good	2200	2200	800	900	2	0	4	4	2	0	No	No	9	Satisfied	Refreshed	Energised	No trouble at all	Almost always	Very difficult	Dissatisfied	Satisfied	Not difficult at all
Yes, I consent for my responses to be used for research purposes	Australia	Male	61-70 years	I am presently in a comitted relationship	Doubles	More than 20 years	0	2	0	0	Home		Few times a week	No	Fair	2300	2300	700	700	2	5	7	6	5	0	No	No	8	Dissatisfied	Hardly refreshed	Hardly energised	A little trouble	Often	A little difficult	Dissatisfied	Dissatisfied	Difficult
Yes, I consent for my responses to be used for research purposes	Australia	Male	61-70 years	I am presently in a comitted relationship	Doubles	More than 20 years	0	0	0	0	Others (Please specify)	Gym	Once a week	No	Fair	0	0	700	700	0	1	0	0	2	0	No	No	7	Dissatisfied	Refreshed	Energised	No trouble at all	Often	Not difficult	Satisfied	Satisfied	Not difficult at all
Yes, I consent for my responses to be used for research purposes	Australia	Male	61-70 years	I am presently in a comitted relationship	Doubles	10 to 15 years	0	2	3	0	Home		Once a week	No	Good	2300	2300	700	700	6	0	1	0	2	0	No	No	8	Satisfied	Refreshed	Energised	No trouble at all	Often	A little difficult	Satisfied	Satisfied	Not difficult at all
Yes, I consent for my responses to be used for research purposes	Australia	Female	71 years or older	I am presently in a comitted relationship	Singles and doubles	More than 20 years	2	2	2	1	Home		less than once a month	No	Good	22.3	2300	600	600	5	3	3	1	2	0	No	No	7	Dissatisfied	Refreshed	Energised	A fair amount of trouble	Sometimes	A little difficult	Satisfied	Satisfied	A little difficult
Yes, I consent for my responses to be used for research purposes	Australia	Male	71 years or older	I am presently in a comitted relationship	Singles and doubles	More than 20 years	2	0	0	0	I'm not performing any physical training during the COVID-19 situation		Few times a week	No	Very good	2230	2230	630	700	7	0	1	0	3	0	Yes	Yes	7	Very Satisfied	Refreshed	Energised	No trouble at all	Sometimes	A little difficult	Satisfied	Satisfied	Not difficult at all
Yes, I consent for my responses to be used for research purposes	Australia	Female	51-60 years	I am presently in a comitted relationship	Doubles	More than 20 years	0	4	0	0	Home,Others (Please specify)	parks	Few times a week	Unsure	Poor	2200	2300	700	830	4	3	3	1	0	0	No	Yes	7	Dissatisfied	Hardly refreshed	Energised	No trouble at all	Sometimes	A little difficult	Satisfied	Satisfied	Not difficult at all
Yes, I consent for my responses to be used for research purposes	Australia	Male	51-60 years	I am presently in a comitted relationship	Doubles	More than 20 years	0	0	0	0	I'm not performing any physical training during the COVID-19 situation		I don't drink alcohol at all	No	Fair	1 day, 0:00:00	01:00:00	08:00:00	08:00:00	3	2	0	0	0	0	No	No	8	Satisfied	Hardly refreshed	Hardly energised	A little trouble	Rarely	A little difficult	Satisfied	Satisfied	A little difficult
Yes, I consent for my responses to be used for research purposes	Australia	Female	41-50 years	I am presently in a comitted relationship	Doubles	3 to 5 years	0	0	0	0	I'm not performing any physical training during the COVID-19 situation		Once every two weeks	No	Good	2300	2300	730	900	5	2	1	1	1	0	No	No	7	Satisfied	Refreshed	Energised	A little trouble	Rarely	A little difficult	Satisfied	Satisfied	A little difficult
Yes, I consent for my responses to be used for research purposes	Australia	Female	51-60 years	I am presently in a comitted relationship	Doubles	More than 20 years	0	3	1	2	Home,Others (Please specify)	Local area	Once every two weeks	Unsure	Good	2130	2130	630	630	5	0	2	2	1	0	No	Yes	8	Satisfied	Refreshed	Energised	No trouble at all	Sometimes	A little difficult	Satisfied	Satisfied	A little difficult
Yes, I consent for my responses to be used for research purposes	Australia	Female	51-60 years	I am presently in a comitted relationship	Singles and doubles	More than 20 years	0	0	0	0	Home,Local park		Few times a week	No	Good	2200	2230	510	830	6	1	1	0	1	0	No	Yes	8	Satisfied	Refreshed	Energised	A little trouble	Sometimes	A little difficult	Satisfied	Satisfied	Not difficult at all
Yes, I consent for my responses to be used for research purposes	Australia	Male	71 years or older	I am presently in a comitted relationship	Doubles	More than 20 years	2	8	10	3	Home		Few times a week	No	Fair	2230	2230	800	800	0	6	0	0	1	1	No	No	9	Dissatisfied	Hardly refreshed	Hardly energised	A fair amount of trouble	Often	Difficult	Satisfied	Satisfied	Difficult
Yes, I consent for my responses to be used for research purposes	Australia	Female	51-60 years	I am presently in a comitted relationship	Doubles	5 to 10 years	1	2	1	0	Home		Few times a week	No	Very good	2230	2230	620	6200	6	0	0	0	0	0	No	No	8	Satisfied	Refreshed	Energised	No trouble at all	Almost always	Not difficult	Very satisfied	Very Satisfied	Not difficult at all
Yes, I consent for my responses to be used for research purposes	Australia	Female	61-70 years	I am single	Doubles	More than 20 years	0	0	0	0	Others (Please specify)	Do not train	Few times a week	No	Fair	Usually go to bed around 2300	2300 or 2400	800	830	4	3	2	2	0	1	Don't know	Yes	8	Dissatisfied	Refreshed	Energised	A little trouble	Often	A little difficult	Satisfied	Satisfied	A little difficult
Yes, I consent for my responses to be used for research purposes	Australia	Female	51-60 years	I am presently in a comitted relationship	Doubles	10 to 15 years	0	2	0	0	Home		Few times a week	No	Good	2300	2300	830	830	3	1	0	1	0	0	No	No	8	Satisfied	Refreshed	Very energised	A little trouble	Sometimes	A little difficult	Satisfied	Satisfied	Difficult
Yes, I consent for my responses to be used for research purposes	Australia	Female	61-70 years	I am presently in a comitted relationship	Doubles	More than 20 years	0	1	0	0	Home,Local park		Few times a week	No	Good	2130	2130	630	630	6	3	2	0	0	0	Yes	Yes	8	Satisfied	Refreshed	Energised	A little trouble	Almost always	Difficult	Satisfied	Satisfied	Not difficult at all
Yes, I consent for my responses to be used for research purposes	Australia	Female	51-60 years	I am presently in a comitted relationship	Doubles	More than 20 years	1	0	0	0	I'm not performing any physical training during the COVID-19 situation		Few times a week	Unsure	Poor	2200	2230	730	830	3	7	7	7	0	0	No	Yes	7	Very Dissatisfied	Hardly refreshed	Hardly energised	A lot of trouble	Almost always	Very difficult	Very Dissatisfied	Very Dissatisfied	Difficult
Yes, I consent for my responses to be used for research purposes	Australia	Male	51-60 years	I am presently in a comitted relationship	Doubles	More than 20 years	3	0	0	0	Home,Local park		Few times a week	No	Fair	2300	2400	600	730	5	2	1	1	3	2	No	Yes	7	Dissatisfied	Refreshed	Energised	A little trouble	Often	Not difficult	Dissatisfied	Satisfied	A little difficult
Yes, I consent for my responses to be used for research purposes	Australia	Female	31-35 years	I am single	Doubles	1 to 3 years	0	1	0	1	Home		I don't drink alcohol at all	No	Very good	2230	2230	645	730	6	0	0	0	0	0	No	No	7	Satisfied	Refreshed	Very energised	No trouble at all	Almost always	Not difficult	Satisfied	Very Satisfied	Not difficult at all
Yes, I consent for my responses to be used for research purposes	Australia	Female	61-70 years	I am presently in a comitted relationship	Doubles	More than 20 years	2	0	0	0	I'm not performing any physical training during the COVID-19 situation		Once every two weeks	No	Fair	2230	2230	600	600	2	5	5	2	0	0	Yes	Yes	7	Dissatisfied	Hardly refreshed	Hardly energised	A fair amount of trouble	Almost always	A little difficult	Dissatisfied	Dissatisfied	A little difficult
Yes, I consent for my responses to be used for research purposes	Australia	Male	61-70 years	I am presently in a comitted relationship	Singles and doubles	More than 20 years	1	2	2	2	Home		Few times a week	No	Fair	23	23	7	8	7	Don't know	Don't know	0	0	0	No	No		Satisfied	Refreshed	Not energised at all	No trouble at all	Rarely	Not difficult	Satisfied	Satisfied	Not difficult at all
Yes, I consent for my responses to be used for research purposes	Australia	Female	61-70 years	I am presently in a comitted relationship	Singles and doubles	More than 20 years	1	0	1	0	Home		Once a month	No	Good	2200	2200	700	700	3	1	7	0	3	0	Yes	Yes	7	Satisfied	Hardly refreshed	Energised	No trouble at all	Almost always	A little difficult	Satisfied	Satisfied	Not difficult at all
Yes, I consent for my responses to be used for research purposes	Australia	Male	41-50 years	I am presently in a comitted relationship	Singles	3 to 5 years	0	0	10	2	Others (Please specify)	On the road	Few times a week	No	Poor	2230	2230	730	900	0	0	7	7	3	0	Yes	Yes	7	Very Dissatisfied	Not refreshed at all	Hardly energised	No trouble at all	Almost always	Difficult	Dissatisfied	Dissatisfied	A little difficult
Yes, I consent for my responses to be used for research purposes	Australia	Male	41-50 years	I am presently in a comitted relationship	Doubles	More than 20 years	0	0	2	1	Home,Local park		Few times a week	No	Fair	2245	2300	645	800	3	2	4	1	0	0	No	No	7	Satisfied	Hardly refreshed	Energised	A little trouble	Often	Difficult	Dissatisfied	Satisfied	Difficult
Yes, I consent for my responses to be used for research purposes	Australia	Female	51-60 years	I am presently in a comitted relationship	Doubles	More than 20 years	2	0	0	0	I'm not performing any physical training during the COVID-19 situation		Few times a week	No	Fair	2230	2230	600	700	7	2	2	0	1	0	No	No	7	Satisfied	Refreshed	Energised	A fair amount of trouble	Sometimes	A little difficult	Satisfied	Satisfied	A little difficult
Yes, I consent for my responses to be used for research purposes	Australia	Male	41-50 years	I am presently in a comitted relationship	Singles and doubles	More than 20 years	0	0	0	0	I'm not performing any physical training during the COVID-19 situation		Few times a week	No	Poor	2359	2359	530	530	0	7	7	7	4	0	Yes	No	7	Very Dissatisfied	Not refreshed at all	Not energised at all	A fair amount of trouble	Almost always	Very difficult	Very Dissatisfied	Very Dissatisfied	Difficult
Yes, I consent for my responses to be used for research purposes	Australia	Male	31-35 years	I am presently in a comitted relationship	Singles and doubles	More than 20 years	3	8	4	2	Home,Local park		Once a month	No	Poor	1am	2am	9am	12pm	1	7	2	Don't know	0	0	No	No	8	Dissatisfied	Hardly refreshed	Hardly energised	A fair amount of trouble	Rarely	Difficult	Very Dissatisfied	Satisfied	A little difficult
Yes, I consent for my responses to be used for research purposes	Australia	Male	51-60 years	I am single	Singles and doubles	More than 20 years	0	2	4	0	Home		I don't drink alcohol at all	No	Good	2400	2400	700	730	7	0	0	0	0	0	No	No	7	Satisfied	Refreshed	Energised	A little trouble	Rarely	A little difficult	Very satisfied	Very Satisfied	Not difficult at all
Yes, I consent for my responses to be used for research purposes	Australia	Male	61-70 years	I am presently in a comitted relationship	Doubles	More than 20 years	0	2	5	0	Local park		Few times a week	No	Very good	2200	2230	730	800	7	0	0	0	1	0	No	No	8	Very Satisfied	Very refreshed	Very energised	No trouble at all	Sometimes	Not difficult	Very satisfied	Very Satisfied	Not difficult at all
Yes, I consent for my responses to be used for research purposes	Australia	Male	51-60 years	I am presently in a comitted relationship	Doubles	More than 20 years	0	0	0	0	Local park		Few times a week	No	Good	22.3	23	7	8.3	4	0	2	0	1	0	No	No	7	Satisfied	Refreshed	Energised	No trouble at all	Almost always	Not difficult	Satisfied	Satisfied	Not difficult at all
Yes, I consent for my responses to be used for research purposes	Australia	Female	71 years or older	I am single	Doubles	More than 20 years	0	0	0	0	Home		less than once a month	No	Fair	23:00:00	23:00:00	7.30 am	7.30 am	6	7	7	0	5	0	No	No		Dissatisfied	Refreshed	Energised	A fair amount of trouble	Almost always	A little difficult	Dissatisfied	Dissatisfied	Not difficult at all
Yes, I consent for my responses to be used for research purposes	Australia	Female	61-70 years	I am single	Doubles	More than 20 years	0	0	0	0	Home		Few times a week	No	Very good	22.3	22.3	7	7	6	0	1	0	0	0	Yes	Yes	8	Very Satisfied	Very refreshed	Energised	No trouble at all	Rarely	Not difficult	Very satisfied	Very Satisfied	Not difficult at all
Yes, I consent for my responses to be used for research purposes	Australia	Female	71 years or older	I am presently in a comitted relationship	Doubles	More than 20 years	0	0	1	0	Home		Few times a week	No	Fair	133	1300	830	830	2	3	2	3	3	0	No		7	Dissatisfied	Hardly refreshed	Energised	A fair amount of trouble	Sometimes	A little difficult	Dissatisfied	Dissatisfied	Difficult
Yes, I consent for my responses to be used for research purposes	Australia	Female	61-70 years	I am presently in a comitted relationship	Doubles	15 to 20 years	0	0	0	2	Others (Please specify)	Local street around home	Few times a week	No	Fair	2230	2300	720	830	4	2	2	3	0	0	No	No	8	Dissatisfied	Hardly refreshed	Hardly energised	A little trouble	Rarely	Not difficult	Satisfied	Very Satisfied	Not difficult at all
Yes, I consent for my responses to be used for research purposes	Australia	Male	51-60 years	I am presently in a comitted relationship	Singles and doubles	10 to 15 years	0	0	0	0	I'm not performing any physical training during the COVID-19 situation		Few times a week	No	Good	2230	2300	730	730	6	0	0	0	0	0	No	No	7	Satisfied	Refreshed	Energised	No trouble at all	Almost always	Not difficult	Satisfied	Satisfied	Not difficult at all
Yes, I consent for my responses to be used for research purposes	Australia	Male	71 years or older	I am presently in a comitted relationship	Doubles	More than 20 years	0	0	0	0	Home		Few times a week	No	Fair	2300	2300	600	700	7	0	0	0	0	0	No	No	6	Very Satisfied	Refreshed	Energised	No trouble at all	Almost always	A little difficult	Satisfied	Satisfied	Not difficult at all
Yes, I consent for my responses to be used for research purposes	Australia	Male	41-50 years	I am single	Doubles	More than 20 years	1	1	2	0	Home,Local park,Others (Please specify)	workplace	Few times a week	No	Very good	1100	1100	630	630	5	1	1	0	0	0	No	No	7	Satisfied	Refreshed	Energised	No trouble at all	Sometimes	A little difficult	Satisfied	Satisfied	Not difficult at all
Yes, I consent for my responses to be used for research purposes	Australia	Male	71 years or older	I am presently in a comitted relationship	Doubles	More than 20 years	0	0	0	0	I'm not performing any physical training during the COVID-19 situation		Few times a week	No	Good	2330	2330	745	845	5	0	1	0	2	0	No	No	8	Satisfied	Refreshed	Energised	No trouble at all	Almost always	Not difficult	Satisfied	Satisfied	Not difficult at all
Yes, I consent for my responses to be used for research purposes	Australia	Male	61-70 years	I am presently in a comitted relationship	Doubles	More than 20 years	0	0	0	0	I'm not performing any physical training during the COVID-19 situation		Few times a week	No	Good	2130	2130	O530	600	5	1	2	1	2	0	No	Yes	7	Satisfied	Refreshed	Energised	A little trouble	Sometimes	Difficult	Satisfied	Satisfied	A little difficult
Yes, I consent for my responses to be used for research purposes	Australia	Male	61-70 years	I am presently in a comitted relationship	Doubles	More than 20 years	0	0	0	0	I'm not performing any physical training during the COVID-19 situation		Few times a week	No	Fair	2230	2230	630	630	2	0	7	0	1	0	No	No	8	Satisfied	Hardly refreshed	Energised	No trouble at all	Often	Not difficult	Satisfied	Dissatisfied	A little difficult
Yes, I consent for my responses to be used for research purposes	Australia	Female	41-50 years	I am presently in a comitted relationship	Singles and doubles	More than 20 years	5	4	1	1	Home		less than once a month	No	Good	2200	2200	800	800	3	2	2	0	0	0	No	No	9	Dissatisfied	Hardly refreshed	Energised	A little trouble	Often	Difficult	Satisfied	Satisfied	A little difficult
Yes, I consent for my responses to be used for research purposes	Australia	Female	71 years or older	Other	Doubles	More than 20 years	0	0	5	1	Home,Local park		Few times a week	No	Fair	2200	2230	700	700	4	3	3	2	4	0	No	Yes	7	Satisfied	Refreshed	Energised	A little trouble	Almost always	Difficult	Satisfied	Satisfied	A little difficult
Yes, I consent for my responses to be used for research purposes	Australia	Male	71 years or older	I am presently in a comitted relationship	Doubles	15 to 20 years	0	2	6	4	Home,Local park,Others (Please specify)	Roads	Few times a week	No	Good	22.3	22.3	7	7	4	0	0	1	2	0	No	No	7	Satisfied	Refreshed	Energised	No trouble at all	Almost always	Not difficult	Very satisfied	Very Satisfied	Not difficult at all
Yes, I consent for my responses to be used for research purposes	Australia	Male	51-60 years	I am presently in a comitted relationship	Doubles	More than 20 years	0	0	0	0	I'm not performing any physical training during the COVID-19 situation		Few times a week	No	Good	30	30	900	900	7	7	0	0	0	0	No	No	8	Satisfied	Refreshed	Energised	A fair amount of trouble	Almost always	Not difficult	Very satisfied	Very Satisfied	A little difficult
Yes, I consent for my responses to be used for research purposes	Australia	Male	41-50 years	I am presently in a comitted relationship	Singles and doubles	5 to 10 years	0	2	2	2	Home,Local park		Few times a week	No	Very good	2400	100	800	900	6	0	1	0	1	0	No	No	7	Satisfied	Refreshed	Energised	No trouble at all	Rarely	A little difficult	Satisfied	Very Satisfied	Not difficult at all
Yes, I consent for my responses to be used for research purposes	Australia	Male	41-50 years	I am presently in a comitted relationship	Doubles	More than 20 years	0	1	2	1	Home,Local park		Once a month	No	Good	2330	0	700	900	3	3	2	3	0	0	No	No	8	Satisfied	Refreshed	Energised	A little trouble	Sometimes	A little difficult	Satisfied	Satisfied	A little difficult
Yes, I consent for my responses to be used for research purposes	Australia	Male	61-70 years	I am presently in a comitted relationship	Doubles	More than 20 years	1	1	2	1	Home		Few times a week	No	Fair	2200	2200	730	800	3	2	2	2	1	0	No	No	8	Satisfied	Refreshed	Energised	A little trouble	Sometimes	Not difficult	Satisfied	Satisfied	A little difficult
Yes, I consent for my responses to be used for research purposes	Australia	Female	51-60 years	I am presently in a comitted relationship	Doubles	More than 20 years	0	0	0	0	Local park		Once a week	No	Good	2200	2230	530	630	5	0	3	2	0	0	No	Yes	8	Satisfied	Refreshed	Energised	A little trouble	Often	A little difficult	Satisfied	Satisfied	A little difficult
Yes, I consent for my responses to be used for research purposes	Australia	Female	61-70 years	I am single	Doubles	3 to 5 years	0	0	0	0	I'm not performing any physical training during the COVID-19 situation		Few times a week	No	Good	22:30:00	22:30:00	08:00:00	08:30:00	6	1	1	1	1	0	No	No	7	Satisfied	Refreshed	Energised	A little trouble	Sometimes	A little difficult	Satisfied	Satisfied	A little difficult
Yes, I consent for my responses to be used for research purposes	Australia	Male	71 years or older	I am presently in a comitted relationship	Doubles	More than 20 years	0	0	0	0	Local park		Few times a week	No	Fair	2245	2245	630	630	5	2	6	0	2	0	No	No	6	Dissatisfied	Refreshed	Energised	A little trouble	Almost always	A little difficult	Dissatisfied	Dissatisfied	A little difficult
Yes, I consent for my responses to be used for research purposes	Australia	Female	61-70 years	I am presently in a comitted relationship	Doubles	More than 20 years	0	2	0	0	Home		Once a month	No	Very good	2300	2300	715	730	7	0	0	0	0	0	No	No	7	Very Satisfied	Refreshed	Energised	No trouble at all	Sometimes	Not difficult	Very satisfied	Very Satisfied	Not difficult at all
Yes, I consent for my responses to be used for research purposes	Australia	Male	61-70 years	I am presently in a comitted relationship	Doubles	More than 20 years	0	1	0	0	Home,Local park		less than once a month	No	Good	930	930	600	700	5	0	0	0	0	0	No	No	8	Satisfied	Refreshed	Very energised	A little trouble	Sometimes	A little difficult	Satisfied	Satisfied	Not difficult at all
Yes, I consent for my responses to be used for research purposes	Australia	Male	71 years or older	I am single	Doubles	More than 20 years	0	3	0	0	Home,Local park		Few times a week	No	Very good	Retired	1600	2200	2200	3	0	3	5	0	0	Yes	Yes	9	Satisfied	Refreshed	Energised	No trouble at all	Rarely	Not difficult	Very satisfied	Very Satisfied	Not difficult at all
Yes, I consent for my responses to be used for research purposes	Australia	Female	61-70 years	I am presently in a comitted relationship	Doubles	More than 20 years	1	0	0	0	Home,Others (Please specify)	neighbourhood	less than once a month	No	Very good	2200	2200	800	800	6	1	0	1	0	0	No	No	8	Satisfied	Refreshed	Energised	No trouble at all	Sometimes	Not difficult	Very satisfied	Very Satisfied	Not difficult at all
Yes, I consent for my responses to be used for research purposes	Australia	Female	41-50 years	I am presently in a comitted relationship	Doubles	More than 20 years	0	0	0	0	Home		Once every two weeks	No	Good	21.3	21.3	7	7	4	1	4	1	1	0	No	No	7	Satisfied	Refreshed	Energised	A little trouble	Almost always	A little difficult	Satisfied	Satisfied	A little difficult
Yes, I consent for my responses to be used for research purposes	Australia	Male	41-50 years	I am presently in a comitted relationship	Doubles	More than 20 years	0	0	0	0	Others (Please specify)	paths & roads (cycling)	Once every two weeks	No	Good	2330	0	730	800	2	1	1	0	2	0	No	No	7	Satisfied	Hardly refreshed	Energised	No trouble at all	Rarely	A little difficult	Satisfied	Satisfied	Not difficult at all
Yes, I consent for my responses to be used for research purposes	Australia	Male	61-70 years	I am single	Doubles	More than 20 years	4	0	2	0	Sporting club,Others (Please specify)	Walking	less than once a month	No	Good	2300	2300	600	600	7	1	2	0	4	0	No	No	7	Satisfied	Refreshed	Energised	No trouble at all	Rarely	Not difficult	Satisfied	Satisfied	Not difficult at all
Yes, I consent for my responses to be used for research purposes	Australia	Female	51-60 years	I am presently in a comitted relationship	Singles and doubles	More than 20 years	0	2	2	0	Home		Once a week	No		1130 pm	11.30 pm	700	730	3	0	2	1	0	0	No	Yes	9	Satisfied	Refreshed	Energised	No trouble at all	Sometimes	Very difficult	Dissatisfied	Dissatisfied	A little difficult
Yes, I consent for my responses to be used for research purposes	Australia	Male	71 years or older	I am presently in a comitted relationship	Singles and doubles	More than 20 years	0	1	1	1	Home		Few times a week	No	Good	2230	2230	600	600	5	0	1	Don't know	5	0	No	No	8	Satisfied	Refreshed	Energised	No trouble at all	Often	Not difficult	Satisfied	Satisfied	Not difficult at all
Yes, I consent for my responses to be used for research purposes	Australia	Male	41-50 years	I am presently in a comitted relationship	Singles and doubles	More than 20 years	0	1	5	1	Home,Local park		Once a month	No	Good	2330	2345	730	900	2	0	0	1	0	0	No	No	8	Satisfied	Hardly refreshed	Hardly energised	No trouble at all	Never	Not difficult	Dissatisfied	Satisfied	A little difficult
Yes, I consent for my responses to be used for research purposes	Australia	Female	51-60 years	I am single	Doubles	More than 20 years	0	0	0	0	Home		less than once a month	No	Very good	100	200	900	1000	6	0	2	0	1	0	No	No	7	Very Satisfied	Very refreshed	Very energised	No trouble at all	Sometimes	Not difficult	Very satisfied	Very Satisfied	Not difficult at all
Yes, I consent for my responses to be used for research purposes	Australia	Female	61-70 years	Other	Doubles	More than 20 years	0	1	2	1	Home,Local park		less than once a month	No	Poor	2400	2400	600	600	0	6	7	3	4	0		Yes	7	Dissatisfied	Not refreshed at all	Hardly energised	A fair amount of trouble	Almost always	Very difficult	Very Dissatisfied	Very Dissatisfied	Difficult
Yes, I consent for my responses to be used for research purposes	Australia	Male	71 years or older	I am presently in a comitted relationship	Doubles	More than 20 years	0	0	0	0	I'm not performing any physical training during the COVID-19 situation		Once a week	No	Good	10.30pm	10.30pm	7am	7am	5	1	2	0	2	0	Yes	Yes		Satisfied	Refreshed	Energised	A little trouble	Often	Not difficult	Satisfied	Satisfied	Not difficult at all
Yes, I consent for my responses to be used for research purposes	Australia	Female	51-60 years	Other	Doubles	More than 20 years	1	0	0	0	I'm not performing any physical training during the COVID-19 situation		Few times a week	No	Fair	0	0	800	800	1	4	6	6	1	0	No	Yes	8	Satisfied	Refreshed	Energised	No trouble at all	Sometimes	Difficult	Satisfied	Satisfied	A little difficult
Yes, I consent for my responses to be used for research purposes	Australia	Female	51-60 years	I am presently in a comitted relationship	Doubles	More than 20 years	0	5	2	1	Home,Local park		Few times a week	No	Good	2230	2300	700	800	5	1	2	0	0	0	No	No	8	Satisfied	Refreshed	Energised	No trouble at all	Often	Not difficult	Satisfied	Satisfied	A little difficult
Yes, I consent for my responses to be used for research purposes	Australia	Male	51-60 years	I am presently in a comitted relationship	Doubles	10 to 15 years	0	0	3	0	I'm not performing any physical training during the COVID-19 situation,Home		Few times a week	No	Fair	2300	2300	600	600	2	4	7	0	1	0	No	Yes	5	Dissatisfied	Hardly refreshed	Energised	A fair amount of trouble	Almost always	A little difficult	Satisfied	Satisfied	Difficult
Yes, I consent for my responses to be used for research purposes	Australia	Female	71 years or older	I am single	Doubles	More than 20 years	0	3	3	2	Home,Local park		Once a week	No	Poor	10.3	10.3	not applicable	7.3	2	5	3	3	0	2	No	Yes	5	Dissatisfied	Hardly refreshed	Energised	A fair amount of trouble	Almost always	Difficult	Satisfied	Satisfied	A little difficult
Yes, I consent for my responses to be used for research purposes	Australia	Female	61-70 years	I am presently in a comitted relationship	Doubles	More than 20 years	0	0	1	0	Others (Please specify)	One to one with trainer	Once a week	No	Good	2200	2300	O700	800	6	0	1	0	4	0	No	No	7	Satisfied	Very refreshed	Energised	No trouble at all	Sometimes	A little difficult	Satisfied	Satisfied	Not difficult at all
Yes, I consent for my responses to be used for research purposes	Australia	Female	36-40 years	I am presently in a comitted relationship	Singles and doubles	5 to 10 years	0	2	2	0	Home,Local park		Once every two weeks	No	Good	12pm	12pm - 1am	07:30:00	08:00:00	6	1	0	0	3	0	No	No	8	Satisfied	Refreshed	Energised	No trouble at all	Rarely	A little difficult	Satisfied	Very Satisfied	Not difficult at all
Yes, I consent for my responses to be used for research purposes	Australia	Male	51-60 years	I am presently in a comitted relationship	Doubles	More than 20 years	0	0	0	0	I'm not performing any physical training during the COVID-19 situation		Few times a week	No	Fair	2300	2300	800	800	7	0	4	2	2	0	No	No	7	Satisfied	Refreshed	Energised	No trouble at all	Often	A little difficult	Satisfied	Satisfied	Not difficult at all
Yes, I consent for my responses to be used for research purposes	Australia	Male	71 years or older	I am presently in a comitted relationship	Doubles	More than 20 years	0	5	5	5	I'm not performing any physical training during the COVID-19 situation		Few times a week	No	Good	Weekday	11pm	7am	7am	7	1	1	0	1	0	No	No	8	Very Satisfied	Very refreshed	Very energised	A little trouble	Almost always	A little difficult	Very satisfied	Very Satisfied	Very Difficult
Yes, I consent for my responses to be used for research purposes	Australia	Male	71 years or older	I am presently in a comitted relationship	Doubles	More than 20 years	2	1	1	1	Home		I don't drink alcohol at all	No	Fair	2100	2100	630	630	6	4	2	0	1	0	No	No	9	Satisfied	Refreshed	Energised	A little trouble	Sometimes	A little difficult	Satisfied	Satisfied	A little difficult
Yes, I consent for my responses to be used for research purposes	Australia	Female	51-60 years	I am presently in a comitted relationship	Doubles	More than 20 years	0	2	1	0	Home,Others (Please specify)	Bush tracks	Few times a week	No	Poor	2230	2230	630	730	4	4	5	2	3	0	No	No	7	Dissatisfied	Hardly refreshed	Hardly energised	A fair amount of trouble	Almost always	Difficult	Dissatisfied	Dissatisfied	A little difficult
Yes, I consent for my responses to be used for research purposes	Australia	Female	61-70 years	I am presently in a comitted relationship	Doubles	More than 20 years	0	0	0	0	I'm not performing any physical training during the COVID-19 situation		I don't drink alcohol at all	No	Poor	2300	2300	700	800	1	6	7	4	2	0	No	Yes	7	Dissatisfied	Hardly refreshed	Hardly energised	A fair amount of trouble	Often	Difficult	Dissatisfied	Dissatisfied	A little difficult
Yes, I consent for my responses to be used for research purposes	Australia	Male	51-60 years	I am presently in a comitted relationship	Doubles	More than 20 years	0	0	0	0	I'm not performing any physical training during the COVID-19 situation,Home		Once a month	No	Good	2300	2200	800	800	3	2	2	2	1	0	No	No	7	Very Satisfied	Refreshed	Very energised	No trouble at all	Sometimes	Not difficult	Satisfied	Satisfied	Difficult
Yes, I consent for my responses to be used for research purposes	Australia	Male	61-70 years	I am single	Doubles	More than 20 years	0	0	0	0	Home		I don't drink alcohol at all	No	Good	100	100	700	700	4	3	4	3	2	0	No	No	9	Satisfied	Hardly refreshed	Energised	A little trouble	Almost always	Very difficult	Satisfied	Satisfied	A little difficult
Yes, I consent for my responses to be used for research purposes	Australia	Male	71 years or older	I am presently in a comitted relationship	Doubles	More than 20 years	1	0	0	0	Home		Few times a week	No	Very good	2230	2230	630	630	7	0	0	0	2	0	No	No	6	Very Satisfied	Very refreshed	Very energised	No trouble at all	Never	Not difficult	Very satisfied	Very Satisfied	Not difficult at all
Yes, I consent for my responses to be used for research purposes	Australia	Male	51-60 years	I am presently in a comitted relationship	Doubles	More than 20 years	0	0	0	0	I'm not performing any physical training during the COVID-19 situation		Once a week	No	Fair	2300	2300	630	730	6	0	4	0	2	0	Yes	Yes	6	Satisfied	Refreshed	Hardly energised	No trouble at all	Almost always	Not difficult	Satisfied	Satisfied	Not difficult at all
Yes, I consent for my responses to be used for research purposes	Australia	Male	71 years or older	I am single	Doubles	More than 20 years	0	0	0	0	I'm not performing any physical training during the COVID-19 situation		I don't drink alcohol at all	No	Fair	2100	2100	530	530	6	0	0	0	1	0	No	No	7	Satisfied	Refreshed	Very energised	A little trouble	Almost always	A little difficult	Very satisfied	Very Satisfied	Not difficult at all
Yes, I consent for my responses to be used for research purposes	Australia	Male	61-70 years	I am presently in a comitted relationship	Singles	More than 20 years	5	6	1	1	Home,Local park		I don't drink alcohol at all	No	Very good	I'm retired. 200 am	200	900	900	7	0	0	0	2	0	No	No	7	Very Satisfied	Refreshed	Energised	No trouble at all	Sometimes	Not difficult	Very satisfied	Very Satisfied	Not difficult at all
Yes, I consent for my responses to be used for research purposes	Australia	Male	61-70 years	I am presently in a comitted relationship	Doubles	More than 20 years	1	0	0	0	I'm not performing any physical training during the COVID-19 situation		Few times a week	No	Good	2200	1130	430	730	4	0	2	2	5	0	No	No		Satisfied	Refreshed	Energised	No trouble at all	Sometimes	Not difficult	Dissatisfied	Very Satisfied	A little difficult
Yes, I consent for my responses to be used for research purposes	Australia	Male	51-60 years	I am presently in a comitted relationship	Singles and doubles	More than 20 years	0	0	0	0	Home		Few times a week	Unsure	Poor	2000	2100	745	830	2	7	6	6	0	7	No	Yes	8	Very Dissatisfied	Hardly refreshed	Hardly energised	A fair amount of trouble	Almost always	Very difficult	Dissatisfied	Satisfied	Difficult
Yes, I consent for my responses to be used for research purposes	Australia	Male	61-70 years	I am single	Doubles	More than 20 years	0	0	0	1	I'm not performing any physical training during the COVID-19 situation		less than once a month	No	Fair	30	30	700	700	4	0	0	0	0	0	No	No	7	Dissatisfied	Refreshed	Energised	No trouble at all	Sometimes	A little difficult	Dissatisfied	Satisfied	Not difficult at all
Yes, I consent for my responses to be used for research purposes	Australia	Female	61-70 years	I am presently in a comitted relationship	Doubles	10 to 15 years	0	1	8	4	Home,Others (Please specify)	local walking tracks	less than once a month	No	Fair	22.3	22.00-23.00	8	8	4	7	7	0	0	0	No	No	6	Satisfied	Refreshed	Energised	A fair amount of trouble	Almost always	Very difficult	Satisfied	Satisfied	A little difficult
Yes, I consent for my responses to be used for research purposes	Australia	Male	51-60 years	I am single	Doubles	More than 20 years	0	0	0	0	I'm not performing any physical training during the COVID-19 situation		less than once a month	No	Fair	2300	2300	800	900	0	0	7	5		0	Yes	Yes	8	Dissatisfied	Refreshed	Hardly energised	A little trouble	Almost always	A little difficult	Dissatisfied	Satisfied	Difficult
Yes, I consent for my responses to be used for research purposes	Australia	Female	61-70 years	I am presently in a comitted relationship	Doubles	More than 20 years	1	0	0	0	Home,Local park,Sporting club		Once a week	No	Poor	2230	2330	900	1000	7	7	7	0	2	0	No	Yes	8	Dissatisfied	Refreshed	Very energised	A fair amount of trouble	Almost always	A little difficult	Satisfied	Very Satisfied	Not difficult at all
Yes, I consent for my responses to be used for research purposes	Australia	Female	41-50 years	I am presently in a comitted relationship	Doubles	More than 20 years	1	0	0	0	Local park		Few times a week	No	Good	2130	2300	745	830	4	0	2	1	1	0	No	No	10	Satisfied	Refreshed	Energised	No trouble at all	Sometimes	Not difficult	Satisfied	Very Satisfied	Not difficult at all
Yes, I consent for my responses to be used for research purposes	Australia	Male	51-60 years	I am presently in a comitted relationship	Doubles	5 to 10 years	0	2	3	0	Home,Local park		Few times a week	No	Fair	2130	2230	700	800	5	0	3	1	0	0	No	No		Dissatisfied	Refreshed	Energised	A little trouble	Often	A little difficult	Dissatisfied	Dissatisfied	Not difficult at all
Yes, I consent for my responses to be used for research purposes	Australia	Female	61-70 years	I am presently in a comitted relationship	Doubles	More than 20 years	0	1	2	0	Home		Once a month	No	Very good	2200	2230	630	730	7	0	7	0	0	0	Yes	Yes	7	Very Satisfied	Refreshed	Energised	No trouble at all	Rarely	Not difficult	Satisfied	Satisfied	Not difficult at all
Yes, I consent for my responses to be used for research purposes	Australia	Male	41-50 years	I am presently in a comitted relationship	Singles and doubles	More than 20 years	0	0	10	0	Home,Local park		Few times a week	No	Very good	0	0	900	900	7	0	0	0	0	0	No	No	9	Very Satisfied	Very refreshed	Very energised	No trouble at all	Never	Not difficult	Very satisfied	Very Satisfied	Not difficult at all
Yes, I consent for my responses to be used for research purposes	Australia	Male	61-70 years	I am presently in a comitted relationship	Singles and doubles	More than 20 years	0	1	7	1	Local park		Few times a week	No	Good		2300	730	700	5	1	2	1	3	0	No	No	8	Satisfied	Refreshed	Hardly energised	No trouble at all	Often	A little difficult	Satisfied	Satisfied	Not difficult at all
Yes, I consent for my responses to be used for research purposes	Australia	Female	51-60 years	I am presently in a comitted relationship	Doubles	More than 20 years	0	4	4	4	Home		Few times a week	No	Very good	2300	2300	830	930	7	0	0	0	0	0	No	No	9	Very Satisfied	Refreshed	Very energised	No trouble at all	Rarely	Not difficult	Very satisfied	Very Satisfied	Not difficult at all
Yes, I consent for my responses to be used for research purposes	Australia	Female	61-70 years	I am presently in a comitted relationship	Doubles	More than 20 years	0	6	2	2	Home,Local park		Few times a week	No	Fair	2130	2130	530	530	5	1	2	0	1		No	No	8	Satisfied	Refreshed	Very energised	No trouble at all	Often	Not difficult	Satisfied	Satisfied	Not difficult at all
Yes, I consent for my responses to be used for research purposes	Australia	Female	61-70 years	I am single	Doubles	More than 20 years	0	1	0	0	Home		Few times a week	No	Fair	2130	20.3	6.3	6.3	1	4	7	5	0	0	Yes	Yes	7	Very Dissatisfied	Hardly refreshed	Hardly energised	A little trouble	Often	Difficult	Dissatisfied	Dissatisfied	A little difficult
Yes, I consent for my responses to be used for research purposes	Australia	Male	61-70 years	I am presently in a comitted relationship	Doubles	More than 20 years	0	0	3	3	Home,Others (Please specify)	Bike track	Once a week	No	Fair	2200	2200	630	700	5	1	2	0	0	0	No	No	7	Satisfied	Refreshed	Very energised	A little trouble	Sometimes	A little difficult	Satisfied	Very Satisfied	Not difficult at all
Yes, I consent for my responses to be used for research purposes	Australia	Female	61-70 years	Other	Doubles	More than 20 years	1	0	0	0	Sporting club		less than once a month	No	Good	2300	2300	600	600	1	0	6	2	3	0	Yes	Yes	7	Dissatisfied	Hardly refreshed	Hardly energised	No trouble at all	Almost always	A little difficult	Satisfied	Satisfied	A little difficult
Yes, I consent for my responses to be used for research purposes	Australia	Male	31-35 years	I am presently in a comitted relationship	Doubles	15 to 20 years	0	0	0	0	Home		Few times a week	No	Good	2230	350	630	900	5	0	2	1	2	0	Yes	Yes	7	Very Satisfied	Refreshed	Energised	A little trouble	Rarely	Not difficult	Satisfied	Satisfied	A little difficult
Yes, I consent for my responses to be used for research purposes	Australia	Male	51-60 years	I am presently in a comitted relationship	Singles and doubles	More than 20 years	3	0	0	0	Local park		Few times a week	No	Good	2300	2400	645	730	4	1	0	0	0	0	No	No	7	Satisfied	Refreshed	Energised	A little trouble	Sometimes	A little difficult	Satisfied	Satisfied	A little difficult
Yes, I consent for my responses to be used for research purposes	Australia	Male	51-60 years	I am presently in a comitted relationship	Singles and doubles	10 to 15 years	0	0	0	0	Local park		less than once a month	No	Fair	11pm	12am	6am	7am	2	0	1	1	3	0	No	No	8	Satisfied	Refreshed	Energised	No trouble at all	Often	A little difficult	Satisfied	Satisfied	A little difficult
Yes, I consent for my responses to be used for research purposes	Australia	Male	41-50 years	I am presently in a comitted relationship	Singles and doubles	More than 20 years	0	0	0	0	Home		Few times a week	No	Good	2300	2300	700	800	6	1	0	0	0	0	No	No	7	Very Satisfied	Refreshed	Hardly energised	A little trouble	Sometimes	Not difficult	Satisfied	Satisfied	Not difficult at all
Yes, I consent for my responses to be used for research purposes	Australia	Female	41-50 years	I am presently in a comitted relationship	Doubles	More than 20 years	0	0	0	0	Home		Few times a week	No	Good	2300	2300	800	900	7	0	1	0	0	0	No	No	8	Satisfied	Refreshed	Very energised	A little trouble	Rarely	Very difficult	Very satisfied	Very Satisfied	Not difficult at all
Yes, I consent for my responses to be used for research purposes	Australia	Male	41-50 years	I am presently in a comitted relationship	Doubles	More than 20 years	2	0	0	0	I'm not performing any physical training during the COVID-19 situation		Few times a week	No	Good	100	100	930	1030	2	4	1	1	7	0	No	No	8	Dissatisfied	Hardly refreshed	Hardly energised	A fair amount of trouble	Rarely	A little difficult	Dissatisfied	Satisfied	A little difficult
Yes, I consent for my responses to be used for research purposes	Australia	Female	41-50 years	I am presently in a comitted relationship	Doubles	More than 20 years	0	0	2	0	Local park		Few times a week	No	Fair	2230	2230	700	730	2	1	6	3	0	0	No	Yes	8	Dissatisfied	Hardly refreshed	Energised	A little trouble	Often	Very difficult	Dissatisfied	Satisfied	A little difficult
Yes, I consent for my responses to be used for research purposes	Australia	Male	26-30 years	I am single	Singles	3 to 5 years	0	2	0	2	Home,Local park		Few times a week	No	Good	0	0	1000	1000	2	3	0	2	0	0	No	Yes	5	Dissatisfied	Hardly refreshed	Hardly energised	A fair amount of trouble	Sometimes	A little difficult	Dissatisfied	Dissatisfied	A little difficult
Yes, I consent for my responses to be used for research purposes	Australia	Male	71 years or older	I am presently in a comitted relationship	Doubles	More than 20 years	0	0	0	0	I'm not performing any physical training during the COVID-19 situation,Others (Please specify)	Bike riding local area	Few times a week	No	Very good	2330	2300	7	7	7	0	0	0	0	0	No	No	7	Very Satisfied	Very refreshed	Energised	No trouble at all	Almost always	Not difficult	Very satisfied	Very Satisfied	Not difficult at all
Yes, I consent for my responses to be used for research purposes	Australia	Female	51-60 years	I am presently in a comitted relationship	Doubles	10 to 15 years	0	0	0	0	Home		Once a week	No	Fair	2230	2300	630	715	2	0	5	4	2	7	No	Yes	7	Dissatisfied	Hardly refreshed	Hardly energised	No trouble at all	Often	Difficult	Dissatisfied	Satisfied	A little difficult
Yes, I consent for my responses to be used for research purposes	Australia	Male	36-40 years	I am presently in a comitted relationship	Singles and doubles	15 to 20 years	1	1	1	0	Home		I don't drink alcohol at all	No	Poor	0100hrs	0100hrs	0723hrs	0830hrs	2	3	0	1	0	0	No	No	6	Satisfied	Refreshed	Energised	A fair amount of trouble	Rarely	A little difficult	Dissatisfied	Satisfied	Difficult
Yes, I consent for my responses to be used for research purposes	Australia	Female	51-60 years	I am presently in a comitted relationship	Doubles	15 to 20 years	0	1	0	0	I'm not performing any physical training during the COVID-19 situation,Home		Once a week	No	Poor	2230	2330	8	9	3	2	7	3	2	2	No	No	7	Dissatisfied	Hardly refreshed	Hardly energised	A little trouble	Almost always	Very difficult	Dissatisfied	Dissatisfied	Not difficult at all
Yes, I consent for my responses to be used for research purposes	Australia	Male	61-70 years	I am presently in a comitted relationship	Doubles	More than 20 years	2	1	1	1	Sporting club,Others (Please specify)	Bike tracks, golf courses	Few times a week	No	Good	2300	2300	700	800	5	0	1	1	2	0	No	Yes	7	Satisfied	Refreshed	Energised	A little trouble	Sometimes	Not difficult	Satisfied	Satisfied	Not difficult at all
Yes, I consent for my responses to be used for research purposes	Australia	Female	41-50 years	I am single	Doubles	15 to 20 years	0	0	0	0	I'm not performing any physical training during the COVID-19 situation		I don't drink alcohol at all	No	Good	2300	2400	600	730	5	1	0	1	2	0	No	No	6	Satisfied	Refreshed	Energised	No trouble at all	Sometimes	Not difficult	Satisfied	Satisfied	Not difficult at all
Yes, I consent for my responses to be used for research purposes	Australia	Female	61-70 years	I am presently in a comitted relationship	Doubles	More than 20 years	0	0	0	0	I'm not performing any physical training during the COVID-19 situation		I don't drink alcohol at all	No	Poor	2300	2300	700	700	0	7	7	7	4	0	No	No	7	Very Dissatisfied	Hardly refreshed	Hardly energised	A lot of trouble	Almost always	Very difficult	Very Dissatisfied	Very Dissatisfied	Very Difficult
Yes, I consent for my responses to be used for research purposes	Australia	Male	61-70 years	I am presently in a comitted relationship	Doubles	More than 20 years	0	2	0	0	Home,Others (Please specify)	bike path	less than once a month	No	Very good	2230	2230	730	730	7	1	0	0	0	0	No	No	9	Satisfied	Refreshed	Energised	No trouble at all	Sometimes	Not difficult	Very satisfied	Very Satisfied	Not difficult at all
Yes, I consent for my responses to be used for research purposes	Australia	Male	31-35 years	I am presently in a comitted relationship	Singles and doubles	More than 20 years	0	3	0	0	Home		Once a week	Unsure	Poor	2100	2200	600	730	1	5	3	2	0	0	No	No	10	Dissatisfied	Hardly refreshed	Energised	A fair amount of trouble	Rarely	A little difficult	Satisfied	Satisfied	A little difficult
Yes, I consent for my responses to be used for research purposes	Australia	Male	51-60 years	I am presently in a comitted relationship	Doubles	More than 20 years	0	0	0	0	I'm not performing any physical training during the COVID-19 situation		Few times a week	No	Good	00:00:00	00:00:00	07:30:00	09:30:00	5	2	2	0	0	0	No	No	7	Satisfied	Refreshed	Energised	A little trouble	Sometimes	A little difficult	Satisfied	Satisfied	Not difficult at all
Yes, I consent for my responses to be used for research purposes	Australia	Female	61-70 years	I am presently in a comitted relationship	Doubles	More than 20 years	0	0	0	0	Home		Once a week	No	Good	2300	2300	800	800	5	1	0	2	0	0	Yes	Yes	8	Satisfied	Refreshed	Energised	A little trouble	Sometimes	A little difficult	Satisfied	Satisfied	A little difficult
Yes, I consent for my responses to be used for research purposes	Australia	Male	71 years or older	I am single	Singles and doubles	More than 20 years	5	0	0	0	I'm not performing any physical training during the COVID-19 situation		Once every two weeks	No	Good	1	1	9	9	6	1	0	0	1	1	No	No	7	Satisfied	Refreshed	Energised	A little trouble	Rarely	Not difficult	Very satisfied	Very Satisfied	A little difficult
Yes, I consent for my responses to be used for research purposes	Australia	Male	41-50 years	I am presently in a comitted relationship	Doubles	More than 20 years	0	0	1	0	I'm not performing any physical training during the COVID-19 situation		Few times a week	No	Very good	2300	2300	500	600	5	0	5	0	4	0	No	Yes	6	Satisfied	Refreshed	Energised	No trouble at all	Almost always	A little difficult	Satisfied	Dissatisfied	A little difficult
Yes, I consent for my responses to be used for research purposes	Australia	Female	41-50 years	I am presently in a comitted relationship	Doubles	More than 20 years	0	3	3	1	Home		Once every two weeks	No	Very good	11pm	11.30pm	7.15am	8.00am	5	2	0	0	0	0		No	8	Very Satisfied	Refreshed	Energised	No trouble at all	Rarely	A little difficult	Very satisfied	Very Satisfied	A little difficult
Yes, I consent for my responses to be used for research purposes	Australia	Male	51-60 years	I am single	Singles and doubles	More than 20 years	1	0	0	0	Others (Please specify)	Local High School	Once a week	No	Good	2230	2230	530	830	6	0	0	0	1	0	No	No	6	Very Satisfied	Very refreshed	Energised	No trouble at all	Sometimes	Not difficult	Satisfied	Very Satisfied	Not difficult at all
Yes, I consent for my responses to be used for research purposes	Australia	Female	61-70 years	I am presently in a comitted relationship	Doubles	More than 20 years	0	1	1	1	Home,Local park		Few times a week	No	Good	22:00:00	22:00:00	07:00:00	07:00:00	7	0	0	0	0	0	No	No	8	Very Satisfied	Refreshed	Energised	No trouble at all	Sometimes	Not difficult	Very satisfied	Very Satisfied	Not difficult at all
Yes, I consent for my responses to be used for research purposes	Australia	Male	51-60 years	I am presently in a comitted relationship	Doubles	10 to 15 years	0	0	2	0	Home		Few times a week	No	Fair	2300	2400	800	900	2	0	5	3	3	0	No	Yes	7	Dissatisfied	Hardly refreshed	Energised	No trouble at all	Often	Very difficult	Satisfied	Satisfied	Not difficult at all
Yes, I consent for my responses to be used for research purposes	Australia	Male	71 years or older	I am presently in a comitted relationship	Doubles	More than 20 years	0	4	8	0	Home,Local park		Few times a week	No	Fair	2130	2200	700	700	5	2	2	1	1	0	No	No	9	Satisfied	Refreshed	Energised	A little trouble	Often	A little difficult	Satisfied	Satisfied	Not difficult at all
Yes, I consent for my responses to be used for research purposes	Australia	Male	36-40 years	I am presently in a comitted relationship	Singles	More than 20 years	0	2	4	0	Local park		Once a week	No	Fair	2300	2300	700	700	4	0	2	1	1	0	No	No	8	Dissatisfied	Refreshed	Energised	A little trouble	Sometimes	A little difficult	Dissatisfied	Satisfied	Difficult
Yes, I consent for my responses to be used for research purposes	Australia	Female	51-60 years	I am presently in a comitted relationship	Doubles	More than 20 years	0	1	1	1	Home		Once every two weeks	No	Very good	2300	2400	700	700	5	0	1	0	1	0	No	No	6	Very Satisfied	Refreshed	Energised	No trouble at all	Rarely	Not difficult	Very satisfied	Very Satisfied	Not difficult at all
Yes, I consent for my responses to be used for research purposes	Australia	Male	41-50 years	I am presently in a comitted relationship	Singles and doubles	More than 20 years	0	1	0	0	Home,Local park		Few times a week	No	Good	30	30	700	800	7	0	0	0	2		No	No	6	Satisfied	Refreshed	Energised	No trouble at all	Sometimes	Not difficult	Satisfied	Satisfied	Not difficult at all
Yes, I consent for my responses to be used for research purposes	Australia	Female	61-70 years	I am presently in a comitted relationship	Doubles	More than 20 years	0	0	0	0	Home		Few times a week	No	Fair	2230	2300	700	800	3	1	1	2	3	0	No	No	9	Satisfied	Hardly refreshed	Energised	A little trouble	Almost always	Not difficult	Satisfied	Satisfied	Not difficult at all
Yes, I consent for my responses to be used for research purposes	Australia	Male	31-35 years	I am single	Doubles	More than 20 years	6	1	0	0	Sporting club		Once a month	Yes	Good	01:00:00	00:00:00	09:30:00	09:00:00	4		1	1	1	0	No	No	9	Satisfied	Refreshed	Energised	No trouble at all	Rarely	Not difficult	Satisfied	Very Satisfied	Not difficult at all
Yes, I consent for my responses to be used for research purposes	Australia	Female	51-60 years	I am single	Singles and doubles	More than 20 years	0	0	5	0	Home		Few times a week	No	Poor	2200	2200	600	630	0	7	7	Don't know	0	1	No	Yes	6	Dissatisfied	Hardly refreshed	Hardly energised	A little trouble	Often	Difficult	Dissatisfied	Dissatisfied	Difficult
Yes, I consent for my responses to be used for research purposes	Australia	Female	71 years or older	I am presently in a comitted relationship	Doubles	More than 20 years	0	1	0	0	Home		Few times a week	No	Fair	23.00 pm	23	6.00 am	6.00 am	3	2	7	0	0		No	Yes	6	Dissatisfied	Hardly refreshed	Energised	A fair amount of trouble	Almost always	Difficult	Dissatisfied	Satisfied	Difficult
Yes, I consent for my responses to be used for research purposes	Australia	Female	61-70 years	I am presently in a comitted relationship	Doubles	More than 20 years	0	0	0	0	I'm not performing any physical training during the COVID-19 situation		Few times a week	No	Very good	2200	2200	800	800	Don't know	2	3	0	0	0	No	No	7	Satisfied	Refreshed	Energised	A little trouble	Sometimes	A little difficult	Satisfied	Satisfied	A little difficult
Yes, I consent for my responses to be used for research purposes	Australia	Male	61-70 years	I am single	Doubles	More than 20 years	0	0	4	0	I'm not performing any physical training during the COVID-19 situation		Few times a week	No	Fair	2400	2400	900	900	5	7	0	1	0	0	No	No	9	Satisfied	Refreshed	Energised	A fair amount of trouble	Almost always	A little difficult	Satisfied	Satisfied	A little difficult
Yes, I consent for my responses to be used for research purposes	Australia	Female	61-70 years	I am presently in a comitted relationship	Doubles	More than 20 years	3	1	0	0	Home,Local park,Sporting club		Few times a week	No	Very good	2230	2300	8	8	6	1	0	1	0	0	No	Yes	8	Very Satisfied	Very refreshed	Very energised	A little trouble	Rarely	Not difficult	Very satisfied	Very Satisfied	Not difficult at all
Yes, I consent for my responses to be used for research purposes	Australia	Male	71 years or older	I am presently in a comitted relationship	Doubles	More than 20 years	0	1	1	1	Home		Few times a week	No	Fair	2230	2230	800	800	0	Don't know	7	0	0	0	No	No	8	Dissatisfied	Hardly refreshed	Energised	A little trouble	Sometimes	Not difficult	Satisfied	Satisfied	A little difficult
Yes, I consent for my responses to be used for research purposes	Australia	Male	51-60 years	I am presently in a comitted relationship	Singles and doubles	More than 20 years	1	1	1	1	Home		Few times a week	No	Very good	2330	2330	800	900	7	0	0	0	0	0	No	No	7	Satisfied	Refreshed	Energised	A little trouble	Sometimes	Not difficult	Satisfied	Satisfied	Not difficult at all
Yes, I consent for my responses to be used for research purposes	Australia	Female	51-60 years	I am presently in a comitted relationship	Doubles	More than 20 years	0	0	2	0	Home		less than once a month	No	Fair	2330	2400	715	830	2	4	1	1	0	0	No	No	7	Satisfied	Hardly refreshed	Energised	A little trouble	Sometimes	Not difficult	Satisfied	Satisfied	A little difficult
Yes, I consent for my responses to be used for research purposes	Australia	Male	51-60 years	I am presently in a comitted relationship	Doubles	More than 20 years	2	11	10	7	Home		less than once a month	No	Very good	2200	2230	600	700	1	1	1	1	0	0	No	No	8	Satisfied	Very refreshed	Energised	No trouble at all	Rarely	A little difficult	Very satisfied	Very Satisfied	Not difficult at all
Yes, I consent for my responses to be used for research purposes	Australia	Male	51-60 years	I am presently in a comitted relationship	Doubles	More than 20 years	0	0	0	0	I'm not performing any physical training during the COVID-19 situation		Once a week	No	Poor	2300	2300	700	700	0	3	7	7	4	0	No	No	7	Very Dissatisfied	Hardly refreshed	Hardly energised	A little trouble	Almost always	A little difficult	Very Dissatisfied	Very Dissatisfied	Very Difficult
Yes, I consent for my responses to be used for research purposes	Australia	Female	71 years or older	I am single	Doubles	More than 20 years	10	0	0	0	I'm not performing any physical training during the COVID-19 situation		I don't drink alcohol at all	No	Good	20.30pm	20.30pm	7.30am	7.30am	Don't know	0	0	0	0	0	No	No	8	Satisfied	Refreshed	Energised	No trouble at all	Sometimes	Not difficult	Satisfied	Satisfied	Not difficult at all
Yes, I consent for my responses to be used for research purposes	Australia	Female	71 years or older	I am presently in a comitted relationship	Doubles	More than 20 years	0	0	0	0	I'm not performing any physical training during the COVID-19 situation		Few times a week	No	Fair	N/A	N/A	N/A	N/A	2	4	3	2	2	0	No	No	9	Dissatisfied	Refreshed	Energised	A little trouble	Often	Difficult	Dissatisfied	Dissatisfied	A little difficult
Yes, I consent for my responses to be used for research purposes	Australia	Male	22-25 years	I am presently in a comitted relationship	Singles	15 to 20 years	0	3	2	2	Home,Local park		less than once a month	No	Very good	2300	2300	900	900	4	0	0	0	0	0	No	No	10	Very Satisfied	Refreshed	Very energised	No trouble at all	Never	Not difficult	Satisfied	Satisfied	Not difficult at all
Yes, I consent for my responses to be used for research purposes	Australia	Female	61-70 years	I am single	Doubles	More than 20 years	0	0	2	1	Home		Few times a week	No	Poor	22:00:00	22:00:00	06:15:00	06:30:00	1	1	4	2	2	0	No	Yes	7	Very Dissatisfied	Hardly refreshed	Hardly energised	A little trouble	Almost always	A little difficult	Very Dissatisfied	Dissatisfied	Not difficult at all
Yes, I consent for my responses to be used for research purposes	Australia	Male	61-70 years	I am single	Doubles	More than 20 years	0	0	0	0	Home		I don't drink alcohol at all	No	Good	2200	2300	620	730	5	0	0	0	0	0	Yes	Yes	8	Satisfied	Refreshed	Energised	A little trouble	Rarely	Not difficult	Satisfied	Satisfied	Not difficult at all
Yes, I consent for my responses to be used for research purposes	Australia	Male	61-70 years	I am presently in a comitted relationship	Doubles	More than 20 years	0	1	3	1	Home		Few times a week	No	Fair	2300	2300	530	530	7	1	5	0	5	0	No	Yes	7	Dissatisfied	Refreshed	Energised	No trouble at all	Almost always	Difficult	Dissatisfied	Dissatisfied	Not difficult at all
Yes, I consent for my responses to be used for research purposes	Australia	Male	51-60 years	I am presently in a comitted relationship	Doubles	3 to 5 years	0	0	0	0	I'm not performing any physical training during the COVID-19 situation		Few times a week	No	Good	22:30:00	22:30:00	06:00:00	06:00:00	3	0	7	0	2	0	Yes	Yes	8	Dissatisfied	Hardly refreshed	Hardly energised	No trouble at all	Almost always	A little difficult	Dissatisfied	Dissatisfied	Not difficult at all
Yes, I consent for my responses to be used for research purposes	Australia	Male	71 years or older	I am presently in a comitted relationship	Doubles	More than 20 years	0	0	2	0	Local park		Few times a week	No	Good	2300	2330	600	600	Don't know	0	2	2	7	0	No	No	7	Dissatisfied	Hardly refreshed	Energised	No trouble at all	Often	Very difficult	Dissatisfied	Dissatisfied	Not difficult at all
Yes, I consent for my responses to be used for research purposes	Australia	Female	41-50 years	I am presently in a comitted relationship	Singles and doubles	More than 20 years	0	0	7	0	Home		Few times a week	No	Good	2200	2300	630	730	6	0	7	2	1	0	Yes	Yes	7	Satisfied	Refreshed	Energised	No trouble at all	Almost always	A little difficult	Satisfied	Dissatisfied	A little difficult
Yes, I consent for my responses to be used for research purposes	Australia	Female	26-30 years	I am presently in a comitted relationship	Doubles	10 to 15 years	0	2	0	0	Home		Few times a week	No	Fair	2230	0	730	900	1	3	1	1	3	0	No	No	8	Dissatisfied	Hardly refreshed	Energised	A little trouble	Rarely	Not difficult	Dissatisfied	Satisfied	A little difficult
Yes, I consent for my responses to be used for research purposes	Australia	Female	61-70 years	I am presently in a comitted relationship	Doubles	More than 20 years	0	1	1	1	Local park,Others (Please specify)	bike path and surrounding streets	Once a week	No	Good	2200	2200	800	830	7	0	0	0	0	0	No	No	8	Satisfied	Refreshed	Energised	No trouble at all	Sometimes	Not difficult	Satisfied	Satisfied	Not difficult at all
Yes, I consent for my responses to be used for research purposes	Australia	Female	41-50 years	I am single	Doubles	More than 20 years	0	0	0	0	Home,Others (Please specify)	neighbourhood	Few times a week	No	Good	2200	2300	700	900	7	1	0	0	0	0	No	No	6	Very Satisfied	Refreshed	Energised	A little trouble	Sometimes	Not difficult	Satisfied	Satisfied	Not difficult at all
Yes, I consent for my responses to be used for research purposes	Australia	Male	61-70 years	I am presently in a comitted relationship	Doubles	More than 20 years	0	1	0	0	Home		I don't drink alcohol at all	No	Good	2300	2300	800	800	5	0	2	0	2	0	No	No	8	Satisfied	Refreshed	Energised	No trouble at all	Sometimes	A little difficult	Satisfied	Satisfied	A little difficult
Yes, I consent for my responses to be used for research purposes	Australia	Male	71 years or older	I am single	Doubles	More than 20 years	0	0	0	0	I'm not performing any physical training during the COVID-19 situation		I don't drink alcohol at all	No	Good	2200	2200	630	630	6	0	2	0	2	0	No	No	8	Satisfied	Refreshed	Hardly energised	No trouble at all	Often	Not difficult	Satisfied	Satisfied	Not difficult at all
Yes, I consent for my responses to be used for research purposes	Australia	Male	71 years or older	I am presently in a comitted relationship	Doubles	More than 20 years	1	1	1	0	Home		Few times a week	No	Good	I don't work, usually go to bed after 2400hrs	After 2400hrs	0800hrs	0900hrs		4	2	Don't know	7	0	No	No	6	Satisfied	Hardly refreshed	Energised	A little trouble	Sometimes	A little difficult	Satisfied	Satisfied	Difficult
Yes, I consent for my responses to be used for research purposes	Australia	Male	51-60 years	I am presently in a comitted relationship	Singles and doubles	5 to 10 years	0	2	2	2	Home,Local park		Once a week	No	Fair	2300	2300	600	600	3	2	5	4	4	0	Yes	Yes	6	Dissatisfied	Refreshed	Energised	A little trouble	Almost always	A little difficult	Dissatisfied	Satisfied	A little difficult
Yes, I consent for my responses to be used for research purposes	Australia	Male	26-30 years	I am presently in a comitted relationship	Singles and doubles	More than 20 years	1	0	2	1	Home,Local park		Once a week	No	Good	2300	30	800	1000	5	2	0	0	0	0	No	No	8	Satisfied	Refreshed	Hardly energised	A little trouble	Rarely	Not difficult	Satisfied	Satisfied	A little difficult
Yes, I consent for my responses to be used for research purposes	Australia	Female	51-60 years	I am presently in a comitted relationship	Doubles	More than 20 years	0	2	3	0	Home,Local park		Once a month	No	Very good	2200	2200	630	700	7	1	0	0	0	0	No	No	7	Very Satisfied	Refreshed	Very energised	No trouble at all	Often	Not difficult	Satisfied	Very Satisfied	A little difficult
Yes, I consent for my responses to be used for research purposes	Australia	Female	41-50 years	I am presently in a comitted relationship	Doubles	More than 20 years	0	0	0	0	Others (Please specify)	i don't train at all	Few times a week	No	Good	2330	2330	800	800	6	0	1	0	1	0	No	No	6	Satisfied	Refreshed	Energised	No trouble at all	Rarely	Not difficult	Satisfied	Satisfied	Not difficult at all
Yes, I consent for my responses to be used for research purposes	Australia	Female	61-70 years	I am presently in a comitted relationship	Doubles	More than 20 years	4	0	6	0	Home,Others (Please specify)	walking and cyclingbtrails	Few times a week	No	Good	2230	2230	700	730	7	0	2	0	2	0	No		7	Satisfied	Refreshed	Energised	A little trouble	Sometimes	A little difficult	Satisfied	Satisfied	Not difficult at all
Yes, I consent for my responses to be used for research purposes	Australia	Female	51-60 years	I am presently in a comitted relationship	Singles and doubles	15 to 20 years	2	0	0	0	Home,Local park		less than once a month	No	Very good	2400	100	745	1000	3	0	1	2	0	0	Yes	Yes	10	Satisfied	Hardly refreshed	Energised	No trouble at all	Sometimes	Not difficult	Dissatisfied	Satisfied	Not difficult at all
Yes, I consent for my responses to be used for research purposes	Australia	Male	31-35 years	I am presently in a comitted relationship	Doubles	10 to 15 years	0	2	2	1	Home,Local park		I don't drink alcohol at all	No	Very good	2230	2330	645	800	6	1	1	2	0	0	No	No	8	Very Satisfied	Refreshed	Energised	No trouble at all	Never	A little difficult	Very satisfied	Very Satisfied	A little difficult
Yes, I consent for my responses to be used for research purposes	Australia	Male	61-70 years	I am presently in a comitted relationship	Doubles	More than 20 years	1	0	4	0	Home,Sporting club		Few times a week	No	Very good	2200	2130	630	700	6	1	1	0	1	0	No	No	9	Very Satisfied	Refreshed	Energised	No trouble at all	Sometimes	Not difficult	Very satisfied	Very Satisfied	Not difficult at all
Yes, I consent for my responses to be used for research purposes	Australia	Male	71 years or older	I am presently in a comitted relationship	Singles and doubles	More than 20 years	2	1	1	0	Home,Local park		I don't drink alcohol at all	No	Good	10.30 pm	10.30 pm	7.30 am	8.00 am	7	Don't know	Don't know	0	0	Don't know	No	No	6	Satisfied	Refreshed	Energised	A little trouble	Sometimes	A little difficult	Satisfied	Satisfied	A little difficult
Yes, I consent for my responses to be used for research purposes	Australia	Female	36-40 years	I am presently in a comitted relationship	Doubles	5 to 10 years	0	4	0	1	Home		Few times a week	No	Fair	2300	2300	600	600	0	0	5	0	2	0	No	No	8	Satisfied	Hardly refreshed	Hardly energised	No trouble at all	Often	A little difficult	Dissatisfied	Dissatisfied	A little difficult
Yes, I consent for my responses to be used for research purposes	Australia	Female	61-70 years	I am presently in a comitted relationship	Doubles	More than 20 years	2	0	4	4	Home,Local park		Few times a week	No	Fair	2300	2300	630	630	1	0	7	3	3	0	No	No	8	Dissatisfied	Hardly refreshed	Hardly energised	No trouble at all	Often	Difficult	Satisfied	Satisfied	Not difficult at all
Yes, I consent for my responses to be used for research purposes	Australia	Female	61-70 years	I am presently in a comitted relationship	Doubles	More than 20 years	0	0	0	0	I'm not performing any physical training during the COVID-19 situation		Few times a week	No	Fair	2300	100	745	900	0	7	6	3	2	0	No	No	8	Very Dissatisfied	Hardly refreshed	Hardly energised	A little trouble	Almost always	Difficult	Dissatisfied	Dissatisfied	Difficult
Yes, I consent for my responses to be used for research purposes	Australia	Male	51-60 years	I am presently in a comitted relationship	Singles and doubles	More than 20 years	0	0	2	1	Home		less than once a month	No	Good	22:30:00	22:30:00	05:30:00	06:30:00	5	0	2	0	5	0	No	No	6	Satisfied	Refreshed	Energised	No trouble at all	Almost always	Not difficult	Satisfied	Satisfied	Not difficult at all
Yes, I consent for my responses to be used for research purposes	Australia	Male	41-50 years	I am presently in a comitted relationship	Singles and doubles	More than 20 years	0	1	0	0	Home		Few times a week	No	Poor	2300	2330	700	900	0	7	7	7	2	0	Yes	Yes	8	Very Dissatisfied	Hardly refreshed	Hardly energised	A little trouble	Almost always	A little difficult	Dissatisfied	Dissatisfied	Difficult
Yes, I consent for my responses to be used for research purposes	Australia	Male	61-70 years	I am presently in a comitted relationship	Doubles	More than 20 years	5	0	0	0	I'm not performing any physical training during the COVID-19 situation		Few times a week	No	Good	2300	2300	800	800	5	0	7	1	0	0	No	No	8	Satisfied	Refreshed	Energised	No trouble at all	Almost always	Difficult	Satisfied	Satisfied	Not difficult at all
Yes, I consent for my responses to be used for research purposes	Australia	Female	61-70 years	I am presently in a comitted relationship	Doubles	More than 20 years	0	0	0	0	I'm not performing any physical training during the COVID-19 situation		Few times a week	No	Good	2300	2300	630	900	3	1	1	1	2	0	No	No	7	Dissatisfied	Hardly refreshed	Energised	No trouble at all	Rarely	A little difficult	Dissatisfied	Satisfied	Not difficult at all
Yes, I consent for my responses to be used for research purposes	Australia	Female	41-50 years	I am presently in a comitted relationship	Doubles	1 to 3 years	0	0	4	0	Local park		less than once a month	No	Good	11pm	midnight	7:30am	8am	5	2	1	1	3	0	No	Yes	7	Satisfied	Refreshed	Energised	No trouble at all	Rarely	Very difficult	Satisfied	Satisfied	A little difficult
Yes, I consent for my responses to be used for research purposes	Australia	Male	31-35 years	I am presently in a comitted relationship	Doubles	1 to 3 years	1	0	0	0	Home		Once a week	No	Good	2230	2300	700	800	5	1	0	0	0	0	No	No	7	Satisfied	Refreshed	Very energised	No trouble at all	Often	Not difficult	Very satisfied	Satisfied	Not difficult at all
Yes, I consent for my responses to be used for research purposes	Australia	Male	61-70 years	I am presently in a comitted relationship	Singles and doubles	More than 20 years	0	1	2	0	Home,Others (Please specify)	gym	I don't drink alcohol at all	No	Good	2200	2300	700	700	6	1	0	0	0	0	No	No	8	Satisfied	Refreshed	Very energised	A little trouble	Often	Not difficult	Very satisfied	Very Satisfied	Not difficult at all
Yes, I consent for my responses to be used for research purposes	Australia	Female	41-50 years	I am presently in a comitted relationship	Doubles	More than 20 years	0	0	2	0	Home		Few times a week	No	Fair	2000hrs	2130hrs	600	700	3	4	4	4	1	0	No	Yes	8	Dissatisfied	Hardly refreshed	Energised	A little trouble	Sometimes	Difficult	Dissatisfied	Satisfied	A little difficult
Yes, I consent for my responses to be used for research purposes	Australia	Female	61-70 years	I am presently in a comitted relationship	Singles and doubles	More than 20 years	0	5	0	0	Others (Please specify)	Crossfit Gym	I don't drink alcohol at all	No	Good	21.3	21.3	5.3	5.3	7	0	0	0	0		No	No	6	Satisfied	Refreshed	Energised	A little trouble	Sometimes	A little difficult	Satisfied	Satisfied	Not difficult at all
Yes, I consent for my responses to be used for research purposes	Australia	Female	51-60 years	I am presently in a comitted relationship	Doubles	More than 20 years	0	1	4	0	Others (Please specify)	walking trail. physio	Few times a week	No	Poor	midnnioght	midnight	06:00:00	06:00:00	2	4	4	0	1	1	No	No	5	Dissatisfied	Refreshed	Energised	A fair amount of trouble	Almost always	A little difficult	Dissatisfied	Dissatisfied	A little difficult
Yes, I consent for my responses to be used for research purposes	Australia	Female	61-70 years	I am single	Doubles	1 to 3 years	0	0	0	0	I'm not performing any physical training during the COVID-19 situation		Once every two weeks	No	Fair	23	23	7	8	5	2	3	1	0	0	No	No	8	Satisfied	Refreshed	Hardly energised	A little trouble	Sometimes	Difficult	Satisfied	Satisfied	Not difficult at all
Yes, I consent for my responses to be used for research purposes	Australia	Female	71 years or older	I am presently in a comitted relationship	Doubles	More than 20 years	2	0	0	0	Home		Once a week	No	Fair	20	22	8	9	2	4	3	3	7	1	No	No	10	Dissatisfied	Hardly refreshed	Hardly energised	A little trouble	Sometimes	A little difficult	Dissatisfied	Satisfied	A little difficult
Yes, I consent for my responses to be used for research purposes	Australia	Female	51-60 years	I am single	Singles	More than 20 years	0	0	0	0	Home,Others (Please specify)	Outside in yard	I don't drink alcohol at all	No	Fair	01:00:00	2-3am	9am	10am	3	0	1	0	3	0	No	Yes	8	Satisfied	Refreshed	Energised	No trouble at all	Never	A little difficult	Satisfied	Very Satisfied	Not difficult at all
Yes, I consent for my responses to be used for research purposes	Australia	Female	61-70 years	I am presently in a comitted relationship	Doubles	More than 20 years	0	0	0	0	Home		less than once a month	No	Fair	2300	2300	700	730	2	1	2	1	2	0	No	Yes	7	Satisfied	Refreshed	Hardly energised	A little trouble	Often	A little difficult	Satisfied	Satisfied	A little difficult
Yes, I consent for my responses to be used for research purposes	Australia	Male	41-50 years	I am presently in a comitted relationship	Doubles	More than 20 years	0	0	2	1	Home,Local park		Few times a week	No	Good	2230	0	640	830	5	0	2	Don't know	1	0	No	No	8	Satisfied	Refreshed	Energised	No trouble at all	Rarely	A little difficult	Satisfied	Satisfied	Not difficult at all
Yes, I consent for my responses to be used for research purposes	Australia	Male	41-50 years	I am presently in a comitted relationship	Doubles	1 to 3 years	0	0	0	0	Home		less than once a month	No	Fair	2200	2200	545	600	2	0	5	0	5	0	No	No	6	Satisfied	Refreshed	Energised	A little trouble	Sometimes	A little difficult	Satisfied	Satisfied	Not difficult at all
Yes, I consent for my responses to be used for research purposes	Australia	Female	36-40 years	I am single	Doubles	More than 20 years	2	0	0	0	I'm not performing any physical training during the COVID-19 situation		Few times a week	No	Good	20	20:00:00	21:00:00	21:00:00	3	0	2	0	0	0	No	No	8	Very Satisfied	Refreshed	Energised	No trouble at all	Rarely	Not difficult	Satisfied	Very Satisfied	Not difficult at all
Yes, I consent for my responses to be used for research purposes	Australia	Female	61-70 years	I am single	Doubles	More than 20 years	0	0	0	0	I'm not performing any physical training during the COVID-19 situation		Few times a week	No	Good	2300	2300	700	700	6	0	0	0	5	0	No	No	6	Satisfied	Refreshed	Energised	A little trouble	Sometimes	Not difficult	Satisfied	Satisfied	Not difficult at all
Yes, I consent for my responses to be used for research purposes	Australia	Male	61-70 years	I am presently in a comitted relationship	Doubles	More than 20 years	4	0	2	0	Home,Local park,Sporting club		Few times a week	No	Fair	22:00:00	22:00:00	07:00:00	07:00:00	2	2	3	1	2	0	No	Yes	8	Dissatisfied	Refreshed	Energised	No trouble at all	Often	A little difficult	Dissatisfied	Dissatisfied	Not difficult at all
Yes, I consent for my responses to be used for research purposes	Australia	Female	61-70 years	I am single	Doubles	More than 20 years	0	0	2	0	Home		Few times a week	No	Fair	2200	2200	700	800	2	0	4	1	1	0	No	No	7	Satisfied	Hardly refreshed	Energised	No trouble at all	Almost always	Difficult	Satisfied	Satisfied	Not difficult at all
Yes, I consent for my responses to be used for research purposes	Australia	Male	51-60 years	I am presently in a comitted relationship	Doubles	More than 20 years	5	1	3	0	Home,Local park		Few times a week	No	Very good	0.3	100	900	930	7	0	0	0	1	0	No	No	8	Satisfied	Refreshed	Energised	No trouble at all	Sometimes	Not difficult	Satisfied	Satisfied	Not difficult at all
Yes, I consent for my responses to be used for research purposes	Australia	Female	51-60 years	I am presently in a comitted relationship	Doubles	More than 20 years	2	0	0	2	I'm not performing any physical training during the COVID-19 situation		Few times a week	No	Poor	2400	2400	1000	900	7	1	0	0	0	0	No	No	7	Satisfied	Refreshed	Energised	A little trouble	Sometimes	Not difficult	Satisfied	Satisfied	Not difficult at all
Yes, I consent for my responses to be used for research purposes	Australia	Female	51-60 years	I am presently in a comitted relationship	Doubles	More than 20 years	0	0	1	0	Others (Please specify)	Local walks	less than once a month	No	Poor	2230	2230	700	700	2	2	2	3	1	0	No	Yes	9	Dissatisfied	Hardly refreshed	Hardly energised	A little trouble	Sometimes	A little difficult	Dissatisfied	Dissatisfied	Difficult
Yes, I consent for my responses to be used for research purposes	Australia	Female	51-60 years	I am presently in a comitted relationship	Doubles	More than 20 years	0	1	1	1	Home,Local park		Once a week	No	Good	2230	1100	600	730	3	0	2	1		0	No	No	7	Dissatisfied	Refreshed	Energised	No trouble at all	Often	Not difficult	Satisfied	Satisfied	Not difficult at all
Yes, I consent for my responses to be used for research purposes	Australia	Male	41-50 years	I am single	Singles and doubles	More than 20 years	0	2	12	0	Home		I don't drink alcohol at all	No	Very good	2230	2300	500	630	5	0	0	1	2	0	No	No	6	Satisfied	Refreshed	Energised	No trouble at all	Rarely	Not difficult	Dissatisfied	Satisfied	Not difficult at all
Yes, I consent for my responses to be used for research purposes	Australia	Male	61-70 years	I am presently in a comitted relationship	Doubles	More than 20 years	0	0	0	0	Home		Few times a week	No	Good	2230	2300	700	700	7	0	0	0	2	0	No	No	7	Satisfied	Refreshed	Energised	No trouble at all	Rarely	Not difficult	Satisfied	Satisfied	Not difficult at all
